# Supplementary material for: Gene therapy for diffuse pleural mesotheliomas in preclinical models by concurrent expression of NF2 and SuperHippo
Source: PubMed Central journal article supplement — Cell Rep Med. 2024 Oct 4;5(10):101763. doi: 10.1016/j.xcrm.2024.101763 (PMC11513813; doi:10.1016/j.xcrm.2024.101763), 2024-10-04
Supplement: mmc2.pdf [file mmc2.pdf]

# Gene therapy for diffuse pleural mesotheliomas in preclinical models by concurrent expression of *NF2* and *SuperHippo*

## Graphical abstract



## Authors

Rui Zhu (朱锐), Xincheng Liu (柳鑫成), Xu Zhang (张栩), ..., Kang Chen (陈康), Dan Ye (叶丹), Fa-Xing Yu (余发星)

## Correspondence

fxyu@fudan.edu.cn

## In brief

Zhu et al. demonstrate that HPO1 is crucial for maintaining Hippo signaling and preventing rapid tumorigenesis in diffuse pleural mesothelioma (DPM) with defective HPO2. Co-activating HPO1 and HPO2 by AAV6-mediated expression of *SuperHippo-P2A-NF2* effectively mitigates tumor progression in DPM mouse models, offering a potential treatment for this aggressive disease.

## Highlights

- *NF2* and *WWC* proteins jointly regulate Hippo signaling and tumorigenesis
- Downregulation of *WWC* promotes diffuse pleural mesothelioma (DPM) development
- Ectopic expression of a *WWC*-derived *SuperHippo* minigene suppresses DPM progression
- AAV6 expressing both *NF2* and *SuperHippo* is a potential gene therapy for DPM



## Article

# Gene therapy for diffuse pleural mesotheliomas in preclinical models by concurrent expression of *NF2* and *SuperHippo*

Rui Zhu (朱锐),<sup>1,5</sup> Xincheng Liu (柳鑫成),<sup>1,5</sup> Xu Zhang (张栩),<sup>1</sup> Zhenxing Zhong (钟振兴),<sup>1</sup> Sixian Qi (祁思娴),<sup>1</sup> Ruxin Jin (靳茹妍),<sup>1</sup> Yuan Gu (顾远),<sup>1</sup> Yu Wang (王瑜),<sup>1</sup> Chen Ling (凌晨),<sup>2</sup> Kang Chen (陈康),<sup>3</sup> Dan Ye (叶丹),<sup>4</sup> and Fa-Xing Yu (余发星)<sup>1,6,\*</sup>

<sup>1</sup>Institute of Pediatrics, Children's Hospital of Fudan University, and Shanghai Key Laboratory of Medical Epigenetics, International Co-laboratory of Medical Epigenetics and Metabolism, State Key Laboratory of Genetic Engineering, Institutes of Biomedical Sciences, Shanghai Medical College, Fudan University, Shanghai 200032, China

<sup>2</sup>State Key Laboratory of Genetic Engineering and Engineering Research Center of Gene Technology (Ministry of Education), School of Life Sciences, Zhongshan Hospital, Fudan University, Shanghai 200438, China

<sup>3</sup>Department of Obstetrics and Gynecology and Barbara Ann Karmanos Cancer Institute, Wayne State University, Detroit, MI, USA

<sup>4</sup>Institutes of Biomedical Sciences, Shanghai Medical College, Fudan University, Shanghai 200032, China

<sup>5</sup>These authors contributed equally

<sup>6</sup>Lead contact

\*Correspondence: [fxyu@fudan.edu.cn](mailto:fxyu@fudan.edu.cn)

<https://doi.org/10.1016/j.xcrm.2024.101763>

## SUMMARY

Diffuse pleural mesothelioma (DPM) is a lethal cancer with a poor prognosis and limited treatment options. The Hippo signaling pathway genes, such as *NF2* and *LATS1/2*, are frequently mutated in DPM, indicating a tumor suppressor role in the development of DPM. Here, we show that in DPM cell lines lacking *NF2* and in mice with a conditional *Nf2* knockout, downregulation of WWC proteins, another family of Hippo pathway regulators, accelerates DPM progression. Conversely, the expression of *SuperHippo*, a WWC-derived mini-gene, effectively enhances Hippo signaling and suppresses DPM development. Moreover, the adeno-associated virus serotype 6 (AAV6) has been engineered to deliver both *NF2* and *SuperHippo* genes into mesothelial cells, which substantially impedes tumor growth in xenograft and genetic DPM models and prolongs the median survival of mice. These findings serve as a proof of concept for the potential use of gene therapy targeting the Hippo pathway to treat DPM.

## INTRODUCTION

Diffuse pleural mesothelioma (DPM) is an aggressive and treatment-resistant cancer originating from the mesothelial lining surrounding the lungs or other pleural tissues.<sup>1,2</sup> Exposure to asbestos or other fibrous minerals is the primary risk factor for DPM.<sup>3–5</sup> Without treatment, patients with DPM consistently display a life expectancy of less than 1 year.<sup>6</sup> Current therapeutic interventions for DPM primarily involve standard cisplatin and pemetrexed chemotherapy.<sup>7–9</sup> However, the response rate to chemotherapy among patients with DPM only ranges between 30% and 40%, with the median overall survival (OS) slightly exceeding 12 months.<sup>7,8,10</sup> A recent phase 3 clinical trial demonstrated that the combined utilization of ipilimumab (a CTLA-4 monoclonal antibody) and nivolumab (a PD-1 monoclonal antibody) can extend the OS by up to 4 months in a subset of patients with DPM.<sup>11</sup> However, some patients exhibit primary resistance to immunotherapy, and the overall prognosis for DPM remains discouraging.<sup>9,12</sup> Hence, there is an urgent need to explore alternative therapeutic modalities to improve the efficacy of DPM treatment. In this pursuit, acquiring comprehensive in-

sights into the molecular mechanisms, particularly key oncogenic signaling pathways underlying the tumor biology of DPM, is crucial for developing effective therapeutic strategies.

The Hippo signaling pathway is critical in regulating organ size, tissue regeneration, and tumorigenesis.<sup>13–17</sup> Yes-associated protein (YAP) and transcriptional co-activator with PDZ-binding motif (TAZ, also known as WWTR1) are downstream effectors of the Hippo pathway and, as proto-oncoproteins, are frequently activated in diverse cancers.<sup>15,16,18–25</sup> The activity of YAP/TAZ is tightly restricted by upstream kinases (MST1/2, MAP4K1–7, and LATS1/2) and scaffolding proteins (SAV1, NF2, WWC1–3, and MOB1).<sup>26–33</sup> These upstream regulators of YAP/TAZ are mostly tumor suppressors, and their inactivation leads to tumorigenesis.<sup>31,34,35</sup> Recently, we have shown that the Hippo signaling network contains two largely independent modules, HPO1 and HPO2, in which WWC1–3 and NF2, as adaptors, mediate the phosphorylation and activation of LATS1/2 by MST1/2 and MAP4K1–7, respectively.<sup>31,36,37</sup> (Figure 1A). Concurrent inactivation of HPO1 and HPO2 genes in mouse livers leads to rapid cancer development, suggesting that HPO1 and HPO2 synergistically regulate YAP/TAZ activity and tumorigenesis.<sup>31</sup> Moreover,





**Figure 1. Deletion of SAV1 or WWC1–3 induces YAP/TAZ activity in DPM cells**

(A) Schematic representation of two Hippo signaling modules. There are two modules within the Hippo signaling network: MST1/2-SAV1-WWC1–3-LATS1/2 (HPO1) and MAP4K1–7-NF2-LATS1/2 (HPO2).

(B) OncoPrint depicting the distribution and alteration patterns of Hippo pathway genes in TCGA DPM datasets.

(C) Expression analysis of Hippo pathway component in NCI-H2373, NCI-H2052, and NCI-H2452 mesothelioma cell lines using immunoblotting.

(D and E) Enhanced YAP/TAZ activity in WWC1–3 tKO and SAV1 KO DPM cells. The pYAP and aYAP indicate phosphorylated and active YAP, respectively. See also Figure S1.

a WWC1-derived SuperHippo minigene can effectively and specifically activate HPO1 signaling and serve as a potent tumor suppressor in liver cancers.<sup>30</sup>

Whole-exome sequencing of human DPM samples has revealed a high prevalence of mutation or deletion in many

tumor suppressor genes, such as CDKN2A/B, NF2, BAP1, and TP53.<sup>38–41</sup> In addition, loss-of-function mutations of LATS2 have also been observed in patients with DPM.<sup>42,43</sup> Among genes frequently mutated, NF2 and LATS2 are major regulators in the Hippo signaling pathway, indicating that the inactivation of



**Figure 2. Downregulation of SAV1 or WWC1–3 expression promotes the tumor-forming capacity of DPM cells**

(A) Colony formation of DPM cell lines was enhanced upon SAV1 deletion.

(B) Colony formation of DPM cell lines was enhanced upon WWC1–3 deletion.

(C) Gross tumor images of tumor xenografts of control or SAV1 KO NCI-H2373 cells implanted in nude mice. Scale bar, 1 cm.

(D and E) Growth curve and tumor weight analysis of control and SAV1 KO NCI-H2373 xenografts. Five mice with 10 tumors for each group were analyzed.

(legend continued on next page)

Hippo signaling is involved in DPM pathogenesis. In support of this, genetic inactivation of *Nf2* and *Trp53* induces tumor formation in the mouse mesothelium.<sup>44</sup>

In this study, we show that the inactivation of *SAV1* or *WWC1* genes in mesothelioma cells results in YAP/TAZ hyperactivation and rapid tumor growth, and expression of *SuperHippo* has the opposite effect. Hence, HPO1 is crucial for maintaining Hippo signaling and preventing rapid tumorigenesis, especially in HPO2-defective (*NF2*-mutated) cells, and it may be employed to develop therapeutics for cancers, including DPM. Indeed, activation of both HPO1 and HPO2 signaling modules by concurrent expression of *NF2* and *SuperHippo* leads to complete inactivation of YAP/TAZ and repression of tumorigenesis, regardless of *NF2* status. Based on these findings, we have developed a preclinical gene therapy for DPM by using an adeno-associated virus (AAV) to deliver both *NF2* and *SuperHippo* into tumor cells, and this approach has effectively blocked tumor progression in both xenograft and genetic DPM models.

## RESULTS

### Inactivation of HPO1 induces YAP/TAZ activity in DPM cells

To assess the involvement of the Hippo pathway in the progression of DPM, we examined the status of major Hippo pathway genes in The Cancer Genome Atlas (TCGA) datasets.<sup>42</sup> In 87 DPM specimens analyzed, *NF2* and *LATS2* were altered in 31% and 11% of samples, respectively, whereas *SAV1*, *WWC1*, or *LATS1* was only altered in 2.4% of samples (Figure 1B). Other Hippo pathway genes were not significantly altered in DPM (Figure 1B). Clearly, there was an enrichment of HPO2 gene (*NF2*) alterations in DPM. On the other hand, alterations of HPO1 genes (*SAV1* and *WWC1/2/3*) were relatively rare in DPM.

HPO1 and HPO2 are required to regulate *LATS1/2* and YAP/TAZ in a synergistic manner.<sup>31,36,37</sup> Hence, we sought to test the function of HPO1 in the development of DPM. We first collected three human DPM cell lines: NCI-H2452, NCI-H2373, and NCI-H2052. Among these cell lines, NCI-H2373 has *NF2* mutation, NCI-H2052 has both *NF2* and *LATS2* mutations, and NCI-H2452 has wild-type *NF2* and *LATS2*.<sup>35,45</sup> The expression of Hippo pathway components was analyzed by immunoblotting. *SAV1* and *WWC1–3* were expressed in all three cell lines (Figure 1C). We then ablated *SAV1* or *WWC1–3* expression in these cells using CRISPR-Cas9 technology and observed a decrease in phosphorylated YAP (pYAP Ser127) and an increase in active/dephosphorylated YAP (aYAP) (Figures 1D and 1E). Furthermore, the mRNA levels of *ANKRD1*, *CTGF*, and *CYR61*, three faithful target genes of YAP/TAZ, were induced in *SAV1*

knockout (KO) or *WWC1–3* triple KO (tKO) cells (Figure S1). The protein level of *CYR61* was also induced in *SAV1* KO or *WWC1–3* tKO cells (Figures 1D and 1E). These results indicate that YAP/TAZ activity is hyperactivated following HPO1 inactivation (*SAV1* or *WWC1–3* deletion) in all three DPM cell lines tested, regardless of *NF2* and *LATS2* status.

### Inactivation of HPO1 promotes tumorigenesis of DPM cells

YAP/TAZ are proto-oncoproteins, and their activation promotes tumorigenesis.<sup>15,16,18–25</sup> We then tested the effect of *SAV1* and *WWC1–3* deletion on the tumorigenic potential of DPM cells. In a colony formation assay, DPM cells deficient in *SAV1* or *WWC1–3* formed significantly more colonies, indicating a growth advantage of these cells (Figures 2A, 2B, S2A, and S2B). YAP/TAZ exert their functions mainly by interacting with TEAD transcription factors (TEAD1–4).<sup>46–50</sup> The colony formation of *SAV1*- or *WWC1–3*-deficient DPM cells was effectively repressed in the presence of VT103 or VT107, two inhibitors of TEAD1 and TEAD1–4, respectively (Figure S2C).<sup>51</sup> Hence, downregulation of *SAV1* or *WWC1–3* can promote the clonogenic potential of DPM cells, which is likely mediated by enhanced YAP/TAZ-TEAD function.

*SAV1* or *WWC1–3* deletion induced YAP/TAZ activity and colony formation of DPM cells, which might enhance tumor growth *in vivo*. Indeed, DPM cells grew poorly when inoculated subcutaneously into nude mice, with NCI-H2373 cells forming small tumors (<40 mm<sup>3</sup>) and NCI-H2052 cells failing to establish solid tumors consistently (Figures 2C–2H and S2D–S2I). In contrast, both NCI-H2372 and NCI-H2052 cells deficient in *SAV1* or *WWC1–3* grew much faster, as indicated by larger tumor size and weight (Figures 2C–2H and S2D–S2I). *SAV1*- or *WWC1–3*-deficient tumors also exhibited higher YAP/TAZ and Ki67 expression, as analyzed by immunohistochemistry staining (Figures 2I–2L and S2J–S2M). Hence, by inactivating HPO1 in DPM cells, we have established DPM xenograft models exhibiting rapid tumor onset.

### Concurrent inactivation of HPO1 and HPO2 induces rapid mesothelioma onset in mice

To mimic the initiation and progression of human DPM, genetically engineered mouse models of DPM have been established by selective inactivation of DPM-related tumor suppressor genes, such as *Nf2*, *Trp53*, *Cdkn2ab*, *Pten*, and *Bap1* (Figure 1B).<sup>38,39,41,42,52,53</sup> Inactivation of HPO1 further induced YAP/TAZ activity and promoted the growth of *NF2*-null DPM cells. Hence, deletion of *Nf2* simultaneously with *Sav1* or *Wwc1/2* (no *Wwc3* gene in mice), i.e., concurrent inactivation

(F) Gross tumor images of tumor xenografts of control or *WWC1–3* KO NCI-H2373 cells implanted in nude mice. Scale bar, 1 cm.

(G and H) Growth curve and tumor weight analysis of control and *WWC1–3* KO NCI-H2373 xenografts. Five mice with 9 tumors for each group were analyzed.

(I and J) Histological assessment of control and *SAV1* KO NCI-H2373 tumor xenografts. H&E and immunohistochemistry (IHC) (Ki67 and YAP) staining and quantifications. Scale bar, 100  $\mu$ m.

(K and L) Histological assessment of control and *WWC1–3* KO NCI-H2373 tumor xenografts. H&E and IHC (Ki67 and YAP) staining and quantifications. Scale bar, 100  $\mu$ m.

Data are presented as mean  $\pm$  SEM from three independent experiments for (A) and (B). Statistical significance: \*,  $p < 0.05$ , \*\*,  $p < 0.01$ , \*\*\*,  $p < 0.001$ . The two-way ANOVA test was used for tumor growth curves (D, I), and the Student's *t* test was used for other data.

See also Figure S2.



(legend on next page)

of HPO1 and HPO2, might also elicit rapid DPM development in mice. We then created mice with various genes floxed, such as *Nf2*<sup>fl/fl</sup>, *Sav1*<sup>fl/fl</sup>, *Wwc1*<sup>fl/fl</sup>;*Wwc2*<sup>fl/fl</sup>, *Nf2*<sup>fl/fl</sup>;*Sav1*<sup>fl/fl</sup>, and *Nf2*<sup>fl/fl</sup>;*Wwc1*<sup>fl/fl</sup>;*Wwc2*<sup>fl/fl</sup> mice, and induced gene deletion by administration of an adenovirus carrying Cre recombinase driven by a cytomegalovirus (CMV) promoter (Adeno-Cre) into the pleural cavity of mice (Figure 3A). The visceral pleura of the lung and heart are the most common sites for DPM development. We, therefore, mainly focused on the pathological changes in the lungs and heart. At 4-week after Adeno-Cre administration, the mesothelial lining surrounding the lung or heart thickened markedly in mice with concurrent HPO1 and HPO2 inactivation (*Nf2*;*Sav1* or *Nf2*;*Wwc1*;*Wwc2* deletion) (Figures 3B–3E). On the other hand, in mice with HPO1 or HPO2 inactivation (*Nf2*, *Sav1*, or *Wwc1/2* deletion), the expansion of the mesothelium was mild even at 45 weeks after Adeno-Cre administration (Figures S3A and S3B). Cells in the thickened layer expressed Wilm’s tumor-1 (WT1) and Mesothelin, indicating a mesothelium origin (Figure 3C). Moreover, Ki67-positive cells were also increased in the mesothelium of mice deficient in both *Nf2* and *Sav1* or *Wwc1/2*, indicating hyperproliferation (Figure 3C). These data demonstrate that the concurrent inactivation of HPO1 and HPO2 in mice accelerates the development of mesothelioma.

*TP53* has been reported as one of the highly mutated genes in DPM, of which the frequency of somatic mutation rate is about 16%, as indicated in TCGA DPM datasets (Figure 1B).<sup>54</sup> Recently, a mouse mesothelioma model with conditional deletions of *Nf2* and *Trp53* has been established to mimic human DPM.<sup>44</sup> Indeed, *Nf2*<sup>fl/fl</sup>;*Trp53*<sup>fl/fl</sup> mice developed mesotheliomas, and, 8 weeks after Adeno-Cre administration, we observed significant thickening of the mesothelium and infiltration of mesothelial cells into the lung and heart (Figures S3C–S3F). To test the effect of *Wwc1/2* deletion in the *Nf2*;*Trp53* model, we established *Nf2*<sup>fl/fl</sup>;*Trp53*<sup>fl/fl</sup>;*Wwc1*<sup>fl/fl</sup>;*Wwc2*<sup>fl/fl</sup> mice and observed further enhanced mesothelium thickening and organ infiltration (Figures S3C–S3F). Furthermore, the expression of WT1, Mesothelin, and Ki67 was also significantly increased in the mesothelium of *Nf2*<sup>fl/fl</sup>;*Trp53*<sup>fl/fl</sup>;*Wwc1*<sup>fl/fl</sup>;*Wwc2*<sup>fl/fl</sup> mice (Figure S3D). Hence, inactivation of HPO1 also promotes the development and progression of mesotheliomas in the *Nf2*;*Trp53* mouse model.

The parietal pleura of the diaphragm and thoracic chest wall are also sites for DPM development.<sup>44</sup> Diaphragm samples from mice with different genotypes were collected and subjected to histological analysis. Like the mesothelium of the lung and heart, diaphragm mesothelium thickening occurred in all mutant

mice, and the phenotype was enhanced in mice with both HPO1 and HPO2 inactivation (Figure S3G). We also compared the life expectancy of mice with various genotypes. While *Nf2*-, *Sav1*-, or *Wwc1*;*Wwc2*-deficient mice lived for more than 1 year, the median survival of *Nf2*;*Sav1* and *Nf2*;*Wwc1*;*Wwc2* mice was 292 days and 264 days, respectively (Figure 3F). *Trp53* deletion on top of *Nf2* deficiency dramatically affected survival, with *Nf2*;*Trp53* mice living for about 125 days, and further KO of *Wwc1/2* shortened the median survival to about 80 days (Figure 3F). This difference in median survival is likely due to both non-aggressive epithelioid or mixed tumors and highly invasive sarcomatoid tumors in *Nf2*;*Trp53* mice, while *Nf2*;*Sav1* or *Wwc1*;*Wwc2* KO mice mainly develop non-aggressive epithelioid tumors (Figures 3C and S3D).<sup>44</sup> Hence, HPO1 inactivation effectively promoted mesothelioma progression and reduced the life expectancy in mice with *Nf2* deficiency.

### HPO1 activation inhibits YAP/TAZ activity and DPM cell proliferation

HPO1 inactivation (deletion of *Sav1* and *Wwc1/2*) in *Nf2*-null cells or tissues significantly induced YAP/TAZ activity and tumorigenesis, indicating that HPO1 and HPO2 signaling may work independently and synergistically, and upregulation of HPO1 signaling in DPM cells may block tumorigenesis. We previously engineered a WWC-derived minigene called *SuperHippo* to specifically and effectively activate HPO1 signaling, which leads to LATS1/2 activation and YAP/TAZ inhibition<sup>30</sup> (Figures 4A and 4B). Ectopic expression of *SuperHippo* or full-length WWC1 in HEK293A cells resulted in a significant increase in YAP phosphorylation and a decrease in CRY61 expression (Figure S4A). In addition, *SuperHippo* induced YAP phosphorylation in *NF2*-null cells, indicating that it works in an NF2-independent manner (Figure S4B).

We then tested if *SuperHippo* can repress YAP/TAZ activity and the proliferation of DPM cells. In three DPM cell lines expressing *SuperHippo*, phosphorylation of YAP was induced, whereas expression of CRY61 was inhibited (Figure 4C). The mRNA levels of YAP/TAZ target genes *ANKRD1*, *CTGF*, and *CYR61* were reduced in cells with ectopic *SuperHippo* expression (Figure 4D). Moreover, the proliferation of DPM cells in the presence of *SuperHippo* was also significantly slowed down (Figure 4E). In line with these data, the colony-forming ability of DPM cells was markedly repressed by *SuperHippo* (Figure 4F). Moreover, *SuperHippo* expression significantly enhanced apoptosis in these DPM cell lines (Figures S4C and S4D). Collectively, these data demonstrate that *SuperHippo*, by activating

### Figure 3. Deletion of *Nf2* and *Sav1* or *WWC1–3* in the mesothelium of pleural cavities in mice led to mesothelioma development

(A) Illustration of intrathoracic injection of Adeno-Cre in mice.  
 (B) Schematic diagram indicating the experimental procedure. Mice ( $n = 5$  for each group) at 4-week-old were injected with Adeno-Cre to delete corresponding genes. Lungs and hearts were collected after 4 weeks for histological analysis.  
 (C) Gross images and histological analysis of lungs and hearts. H&E and IHC staining for WT1, Mesothelin, and Ki67 expression were performed. Genotypes of mice were indicated. Scale bars, 5 mm for gross lung and heart images and 50  $\mu\text{m}$  for H&E or IHC images.  
 (D and E) Quantification of the average thickness of lung (D) and heart (E) mesothelium in mice with different genotypes. Mesothelium thickness is primarily defined by Mesothelin staining signals.  
 (F) Survival curves of mice with different genotypes following Adeno-Cre injection. The number of mice used was indicated. Data are presented as mean  $\pm$  SEM. Statistical significance: \*,  $p < 0.05$ , \*\*,  $p < 0.01$ , \*\*\*,  $p < 0.001$ . The Student’s  $t$  test was used for statistical analysis. See also Figure S3.



**Figure 4. Expression of SuperHippo activates Hippo signaling in mesothelioma cell lines**

(A) Schematic diagram illustrating full-length WWC1 and SuperHippo (1–200 aa of WWC1). (B) Schematic diagram illustrating the activation of the Hippo signaling by SuperHippo via its functional engagement in the HPO1 signaling module. (C) SuperHippo expression in mesothelioma cell lines inactivates YAP. (D) Decreased mRNA levels of YAP/TAZ target genes *ANKRD1*, *CTGF*, and *CYR61* upon SuperHippo expression in mesothelioma cell lines. (E) SuperHippo expression induces cell death in mesothelioma cell lines. Cell counting kit-9 (CCK8) assays were performed. (F) SuperHippo expression represses colony formation of mesothelioma cell lines. Data are presented as mean  $\pm$  SEM from three independent experiments. Statistical significance: \*,  $p < 0.05$ , \*\*,  $p < 0.01$ , \*\*\*,  $p < 0.001$ . The Student's *t* test was used. See also Figure S4.

*SuperHippo* driven by the CMV early enhancer/chicken beta-actin/beta-globin intron [CAG] promoter at the *Rosa26* locus with *Nf2<sup>fl/fl</sup>;Trp53<sup>fl/fl</sup>* mice to generate *Nf2<sup>fl/fl</sup>;Trp53<sup>fl/fl</sup>;SuperHippo<sup>fl/+</sup>* mice.<sup>30</sup> *SuperHippo* expression was detected in lung and heart tissues of *Nf2<sup>fl/fl</sup>;Trp53<sup>fl/fl</sup>;SuperHippo<sup>fl/+</sup>* mice treated with Adeno-Cre (Figures 5A and S5A). Strikingly, the mesothelium thickening and parenchymal infiltration in both lung and heart resulted from *Nf2* and *Trp53* deletion was significantly inhibited in mice expressing *SuperHippo* (Figures 5B–5D). Moreover, the expression of WT1, Mesothelin, and Ki67 all reduced upon *SuperHippo* expression, indicating a tumor-suppressive role of *SuperHippo* (Figure 5B). Importantly, *SuperHippo* expression significantly improved the survival of the mice from 95 to 124 days (Figure 5E). Furthermore, the expression of *SuperHippo* was well-tolerated by normal mesothelium, because no significant change in the mesothelium thickness or structural integrity was detected upon *SuperHippo* expression (Figures S5B–S5F). Collectively, these data

the HPO1 signaling, can inhibit the proliferation of DPM cells *in vitro*.

### Activating HPO1 signaling inhibits tumorigenesis in mice

Next, we sought to test the effect of HPO1 activation on tumorigenesis in a mouse DPM model. To this end, we crossed a conditional *SuperHippo* transgenic mice (*Loxp-stop-loxp-3xFlag-*

demonstrate that *SuperHippo*, by activating HPO1, can inhibit the development of mesothelioma in mice, suggesting a potential of *SuperHippo* for treating DPM.

### Concurrent HPO1 and HPO2 activation inhibits the development of DPM

Multiple genes in the Hippo signaling network are mutated in DPMs, such as *NF2*, *LATS1/2*, and *WWC1* (Figure 1B).



**Figure 5. SuperHippo expression represses the development of mesothelioma in a genetic mouse model**

(A) Schematic diagram indicating experimental procedure. Adeno-Cre was injected into 4-week-old *Nf2<sup>fl/fl</sup>; Trp53<sup>fl/fl</sup>* or *Nf2<sup>fl/fl</sup>; Trp53<sup>fl/fl</sup>; SuperHippo<sup>fl/+</sup>* mice ( $n = 4-6$  each); after 8 weeks, lungs and hearts were collected for histological analysis.

(B) Gross image and histological analysis of lungs and hearts. H&E and IHC staining for WT1, Mesothelin, and Ki67 expression was performed. Scale bar, 5 mm for gross images, and 50  $\mu$ m for H&E or IHC images.

(C and D) Quantification of the average thickness of lung and heart mesothelium. Mesothelium thickness is primarily defined by Mesothelin staining signals.

(E) Survival curves of *Nf2<sup>fl/fl</sup>; Trp53<sup>fl/fl</sup>* and *Nf2<sup>fl/fl</sup>; Trp53<sup>fl/fl</sup>; SuperHippo<sup>fl/+</sup>* mice ( $n = 4-6$  each) after Adeno-Cre injection.

Data are presented as mean  $\pm$  SEM. Statistical significance: \*,  $p < 0.05$ , \*\*,  $p < 0.01$ , \*\*\*,  $p < 0.001$ . The log rank (Mantel-Cox) test was used for survival curves (E), and the Student's  $t$  test was used for other data.

See also Figure S5.

Ectopic expression of a functional *NF2* gene will, in principle, normalize HPO2 signaling in DPMs with *NF2* mutations. However, it is currently unclear if this normalized HPO2 signaling effectively kills DPM cells. Moreover, the expression of *NF2* should not work in DPMs with alteration in *LATS1/2* and *WWC1*. In contrast, *SuperHippo* has a broader application, as its ectopic expression will induce HPO1 signaling in all DPM cells with *NF2*, *LATS1*, *LATS2*, or *WWC1* mutations. We reasoned that concurrent activation of HPO1 and HPO2, by expression of both *NF2* and *SuperHippo*,

should lead to more complete inactivation of YAP/TAZ oncoproteins and be effective for treating DPMs with distinct gene alterations.

We then assessed the effect of the expression of *NF2*, *SuperHippo*, or *SuperHippo-P2A-NF2* (a construct expresses a fusion protein that can be specifically cleaved into SuperHippo and *NF2*) in *WWC1-3* tKO NCI-H2052 cells. *SuperHippo* or *NF2* expression alone induced phosphorylation of *LATS1/2* and YAP and reduced cell proliferation and colony formation. Interestingly, these changes were significantly amplified in cells



**Figure 6. Expression of *SuperHippo-P2A-NF2* represses DPM development**

(A) Expression of both *SuperHippo* and *NF2* may effectively repress the development of DPM with *NF2* mutations (HPO2) or *LATS1/2* mutations (HPO1/2).  
(B) Expression of *SuperHippo-P2A-NF2* leads to the maximum activation of Hippo signaling in DPM cells. *NF2*, *SuperHippo*, or *SuperHippo-P2A-NF2* was stably expressed in *WWC1-3* tKO NCI-H2052 DPM cells. Cell lysates were subjected to immunoblotting to assess the phosphorylation status of YAP and LATS1/2. These cell lines were also used in (C–E).  
(C) *SuperHippo-P2A-NF2* expression represses the proliferation of DPM cells. The proliferation of different cells was monitored over 4 days by live cell imaging.

(legend continued on next page)

expressing *SuperHippo-P2A-NF2* (Figures 6A–6E). These results demonstrate an anti-tumor effect of *SuperHippo-P2A-NF2* in DPM cells *in vitro*.

AAV-based vectors are frequently used for gene therapy.<sup>55</sup> Both NF2 and SuperHippo are relatively small and suitable for AAV-based gene delivery. We compared the infection efficiency of multiple AAV serotypes in NCI-H2052 cells and found that AAV6 exhibited a distinct tropism for DPM cells (Figure S6A). Next, we constructed an AAV6-based vector containing a CMV promoter followed by the *SuperHippo-P2A-NF2* coding sequence. Subsequently, we evaluated the anti-tumor potential of *SuperHippo-P2A-NF2* in the *WWC1*-tKO NCI-H2052 xenograft model. When the average tumor volume reached about 75 mm<sup>3</sup>, we performed intratumoral injection of AAV6-*SuperHippo-P2A-NF2* or AAV6-control. Strikingly, the growth of AAV6-*SuperHippo-P2A-NF2*-treated tumors was significantly suppressed, as evidenced by the slow increase in tumor volume and a notable reduction in tumor weight (Figures 6F–6I). In addition, the proliferation of tumor cells with *SuperHippo* and *NF2* expression was reduced, as indicated by the decreased Ki67 staining (Figures S6B and S6C). Together, AAV6-mediated expression of *SuperHippo-P2A-NF2* is effective in inhibiting DPM tumor growth.

### **SuperHippo-P2A-NF2 gene therapy mitigates tumor progression in mice**

To further assess the *in vivo* function of AAV6-*SuperHippo-P2A-NF2*, we tested its effect on the development of mesothelioma in the *Nf2;Trp53* mouse model. One week after intrathoracic Adeno-Cre injection in 4-week-old *Nf2<sup>fl/fl</sup>;Trp53<sup>fl/fl</sup>* mice, AAV6 (control) or AAV6-*SuperHippo-P2A-NF2* (treated) was administered ( $2.3 \times 10^{11}$  viral genomes/mouse) into the pleural cavity of randomly selected mice (Figure 7A). There was no significant difference in body weight between the control and treated groups within 80 days following treatment (Figure 7B). However, administration of AAV6-*SuperHippo-P2A-NF2* resulted in the remission of mesothelioma development, as evidenced by reduced mesothelium thickening and decreased Mesothelin, WT1, and Ki67 expression (Figures 7C–7E). More importantly, the survival of AAV6-*SuperHippo-P2A-NF2*-treated *Nf2;Trp53* mice was significantly prolonged (Figure 7F). Full-length SuperHippo-P2A-NF2 and cleaved SuperHippo were detected in the protein lysates of lungs and hearts of treated mice, and expression of CYR61 and CTGF in these organs was also reduced (Figure 7G). On the other hand, compared to *SuperHippo-P2A-NF2*, the efficacy of *Nf2* or *SuperHippo* single-agent therapy was lower, as evidenced by a relatively weak reduction in mesothelium thickness (Figures S7A–S7E). These results demonstrate that concurrent activation of HPO1 and HPO2 via

AAV6-*SuperHippo-P2A-NF2* gene therapy is an effective strategy for DPM management in preclinical tumor models.

### **DISCUSSION**

We have reported recently that two signaling modules, HPO1 and HPO2, regulate LATS1/2 and YAP/TAZ in a synergistic manner.<sup>31,36,37</sup> This study has demonstrated that deleting both HPO1 and HPO2 genes leads to a rapid development of DPM. In contrast, ectopic expression of the *SuperHippo* minigene effectively enhances HPO1 signaling and suppresses DPM. Furthermore, by using AAV6 to deliver both *NF2* and *SuperHippo* genes, a gene therapy is developed to block the progression of DPM in preclinical models. Collectively, these findings underscore the critical role of the Hippo pathway in the development of DPM and provide a proof of concept for the use of gene therapy in treating this deadly disease.

Inactivation of Hippo pathway genes occurs frequently in patients with DPM and contributes to tumor progression and worse prognosis.<sup>35,42,43,56–60</sup> A recent report indicates that alterations of *NF2* and *LATS2* in DPMs are associated with different molecular signatures.<sup>61</sup> Hence, according to the genes altered, various DPMs may have distinct clinical features due to differential YAP/TAZ activation status. Notably, co-occurring alterations of multiple Hippo pathway genes are observed in a small fraction of DPM specimens (Figure 1B). Indeed, a distinct subset of DPMs harboring both *LATS2* and *NF2* mutations and functional investigations indicate that the inactivation of either *NF2* or *LATS2* has no apparent effect on the proliferation of DPM cells, whereas the inactivation of both genes effectively enhances the proliferation of DPM cells.<sup>58,61</sup> Hence, combined inactivation of multiple genes in the Hippo pathway represents a mechanism underpinning rapid DPM progression.

Targeting the Hippo pathway is an appealing strategy for treating YAP/TAZ-dependent cancer.<sup>62–64</sup> Hence, therapeutics inactivating YAP/TAZ activity hold a promise for patients with DPM. Directly targeting the YAP/TAZ-TEAD complex, a key downstream effector of the Hippo pathway, is under intensive investigation. Agents have been developed to either directly disrupt YAP/TAZ-TEAD interaction or inhibit TEAD palmitoylation, such as verteporfin, MGH-CP1, TED347, K975, VT103, and VT107.<sup>49,51,65–70</sup> It would be meaningful to test the anti-cancer effect of these molecules in genetic mouse models of DPM in the future. However, due to the crucial roles of YAP/TAZ in various tissues, systemic delivery of these molecules may cause side effects, which should be carefully assessed in clinical trials. AAV-based gene therapy reported here can achieve localized drug delivery, representing an alternative treatment modality.

(D and E) *SuperHippo-P2A-NF2* expression effectively inhibits the colony formation of DPM cells. Crystal violet staining (D) indicates colony formation capacity, and quantification (E) was shown; data represent mean  $\pm$  SEM from three independent experiments.

(F) Schematic diagram indicating the experimental procedure. *WWC1-3 tKO* NCI-H2052 cells were inoculated subcutaneously into nude mice, and, when tumors reached 75 mm<sup>3</sup>, mice were randomly assigned into two groups. AAV6-control or AAV6-*SuperHippo-P2A-NF2* was injected intratumorally, and, 20 days later, tumors were harvested for examination.

(G–I) AAV6-mediated expression of *SuperHippo-P2A-NF2* represses the progression of DPM in a xenograft mouse model.  $n = 5–8$  for each group. Tumor gross images, tumor growth curve, and tumor weight were shown (5–6 tumors for each group were analyzed). Scale bars: 1 cm. Data are presented as mean  $\pm$  SEM. Statistical significance: \*,  $p < 0.05$ , \*\*,  $p < 0.01$ , \*\*\*,  $p < 0.001$ . One-way or two-way ANOVA (C and H) and Student's *t* test (E and I) were used.

See also Figure S6.



**Figure 7. Mitigation of tumor progression by AAV6-SuperHippo-P2A-NF2 in *Nf2;Trp53* dKO mouse DPM model**

(A) Schematic diagram indicating the experimental procedure. Adeno-Cre was injected intrathoracically into 4-week-old *Nf2<sup>fl/fl</sup>;Trp53<sup>fl/fl</sup>* mice to initiate DPM, and, one week later, AAV6-control or AAV6-SuperHippo-P2A-NF2 was injected intrathoracically. Lungs and hearts were collected for histological analysis after another 8 weeks.  $n = 5-7$  for each group.

(B) Body weight measurement of mice used.

(C) H&E and IHC staining of lung and heart tissue sections from control and treated mice. IHC for WT1, Mesothelin, YAP, and Ki67 were shown. Scale bar, 5 mm for gross lung and heart images, and 50  $\mu\text{m}$  for H&E or IHC images.

(D and E) Measurement of the average thickness of lung and heart mesothelium in mice from control and treated groups. Mesothelium thickness is primarily defined by Mesothelin staining signals.

(F) Overall survival curve of mice treated with AAV6-control or AAV6-SuperHippo-P2A-NF2.

(legend continued on next page)

DPMs have relatively clear hotspot driver mutations, such as those found in *NF2*, *TP53*, *CDKN2A/B*, and *BAP1*.<sup>38,39,41,42,52,53</sup> In principle, gene therapy is suitable to treat DPMs. Currently, gene therapies, such as oncolytic viruses and virus-carrying suicide genes, are available for patients with DPM in clinical trials.<sup>71–73</sup> As shown earlier, the Hippo pathway plays a pivotal role in maintaining the homeostasis of the plural mesothelium (Figure 3). Hence, activating the Hippo signaling via gene replacement or functional restoration should repress DPM progression. The mesothelium monolayer and malignant cells provide a relatively large surface area for gene transduction. In addition, the pleural cavity is accessible for gene delivery, and, as a closed space, it may retain viruses with limited diffusion and dilution.<sup>73</sup> The AAV6-mediated expression of *SuperHippo-P2A-NF2* is efficient and flexible, and this approach may be employed to treat DPMs in the future.

*NF2* loss of function, either by mutation or deletion, has been found in different cancers, including DPM, schwannomas, ependymomas, and meningiomas, and these tumors are all derived from monolayer cells covering internal cavities.<sup>15,17</sup> We have hypothesized that HPO2 plays a dominant role in two-dimensional monolayer tissues, and the formation of cell-cell junctions in these tissues might be critical for *NF2* to activate hippo signaling.<sup>31</sup> Conversely, HPO1 appears to function primarily in three-dimensional tissues, exerting a more pronounced effect on organ size.<sup>31</sup> In this study, we revealed the roles of HPO1 in mesothelioma, highlighting its importance in sustaining Hippo signaling and preventing rapid tumorigenesis when HPO2 is defective. Based on the common genetic alterations and tissue topological features, it is likely that all these *NF2*-mutated tumors can be treated with the AAV6-based *SuperHippo-P2A-NF2* gene therapy. However, due to specific anatomic features, it remains challenging to deliver AAV-based therapies into different tumors.

### Limitations of the study

In this study, gene therapy has been shown to prevent tumor growth in xenograft and genetic DPM models. However, these models may not fully recapitulate the molecular heterogeneity of human DPM. Therefore, it is important to evaluate this gene therapy in patient-derived xenograft (PDX) mesothelioma models. Moreover, since *NF2* mutations in DPM often co-occur with *CDKN2A/B* and *BAP1* mutations, the efficacy of this gene therapy in these contexts also warrants further investigation. Furthermore, this gene therapy is designed for YAP/TAZ-driven mesotheliomas; its effect in mesotheliomas without Hippo pathway inactivation should be tested in genetic and PDX models in the future.

### RESOURCE AVAILABILITY

#### Lead contact

Further information and requests for resources and reagents should be directed to and will be fulfilled by the lead contact, Fa-Xing Yu (fxyu@fudan.edu.cn).

### Materials availability

All unique/stable reagents generated in this study are available from the lead contact with a completed Uniform Biological Materials Transfer Agreement.

### Data and code availability

- This paper analyzes existing, publicly available data. These accession numbers for the datasets are listed in the key resources table.
- This paper does not report original code.
- Any additional information required to reanalyze the data reported in this paper is available from the lead contact upon request.

### ACKNOWLEDGMENTS

This study was supported by grants from the National Key R&D Program of China (2020YFA0803202, 2018YFA0800304), the National Natural Science Foundation of China (32425017, 32370770, 32200570, 82403053), the Science and Technology Commission of Shanghai Municipality (21S11905000), and the Shanghai Municipal Health Commission (2022XD049). This work was also supported by the Medical Science Data Center and the Core Facility at the Shanghai Medical College of Fudan University.

### AUTHOR CONTRIBUTIONS

R.Z., X.L., X.Z., Z.Z., S.Q., R.J., Y.G., and Y.W. performed experiments. C.L., K.C., and D.Y. provided key reagents and comments. R.Z. and F.-X.Y. analyzed data and wrote the manuscript. F.-X.Y. conceived and supervised the project.

### DECLARATION OF INTERESTS

A patent application about mesothelioma gene therapy has been filed.

### STAR★METHODS

Detailed methods are provided in the online version of this paper and include the following:

- KEY RESOURCES TABLE
- EXPERIMENTAL MODEL AND STUDY PARTICIPANT DETAILS
  - Mouse models
  - Cell lines and cell culture
- METHOD DETAILS
  - CRISPR/Cas9 gene editing
  - Transfection of plasmids, RNA interference, and lentivirus production
  - Immunoblotting
  - RNA extraction, cDNA synthesis, and quantitative RT-PCR (qRT-PCR) analyses
  - Colony formation
  - CCK8 assay
  - Tumor xenograft model
  - AAV6 virus production and injection
  - Histology and IHC staining
  - TEAD inhibitors for cell-based assays
- QUANTIFICATION AND STATISTICAL ANALYSIS

### SUPPLEMENTAL INFORMATION

Supplemental information can be found online at <https://doi.org/10.1016/j.xcrm.2024.101763>.

(G) Immunoblotting analysis of *SuperHippo-P2A-NF2* expression and cleavage in lungs and hearts from mice treated with AAV6-*SuperHippo-P2A-NF2*. Expression of YAP/TAZ targets, CTY61 and CTGF, was also reduced in treated samples.

Data are presented as mean ± SEM. Statistical significance: \*,  $p < 0.05$ , \*\*,  $p < 0.01$ , \*\*\*,  $p < 0.001$ . The log rank (Mantel-Cox) test was used for the overall survival curve (F), and the Student's *t* test for other data.

See also Figure S7.

Received: March 20, 2024  
Revised: August 3, 2024  
Accepted: September 12, 2024  
Published: October 4, 2024

REFERENCES

- Craighead, J.E. (1987). Current pathogenetic concepts of diffuse malignant mesothelioma. *Hum. Pathol.* 18, 544–557. [https://doi.org/10.1016/s0046-8177\(87\)80354-4](https://doi.org/10.1016/s0046-8177(87)80354-4).
- Zhou, S., Liu, L., Li, H., Eilers, G., Kuang, Y., Shi, S., Yan, Z., Li, X., Corson, J.M., Meng, F., et al. (2014). Multipoint targeting of the PI3K/mTOR pathway in mesothelioma. *Br. J. Cancer* 110, 2479–2488. <https://doi.org/10.1038/bjc.2014.220>.
- Curran, D., Sahmoud, T., Therasse, P., van Meerbeeck, J., Postmus, P.E., and Giaccone, G. (1998). Prognostic factors in patients with pleural mesothelioma: the European Organization for Research and Treatment of Cancer experience. *J. Clin. Oncol.* 16, 145–152. <https://doi.org/10.1200/JCO.1998.16.1.145>.
- Milano, M.T., and Zhang, H. (2010). Malignant pleural mesothelioma: a population-based study of survival. *J. Thorac. Oncol.* 5, 1841–1848. <https://doi.org/10.1097/JTO.0b013e3181f1cf2b>.
- Zhai, Z., Ruan, J., Zheng, Y., Xiang, D., Li, N., Hu, J., Shen, J., Deng, Y., Yao, J., Zhao, P., et al. (2021). Assessment of Global Trends in the Diagnosis of Mesothelioma From 1990 to 2017. *JAMA Netw. Open* 4, e2120360. <https://doi.org/10.1001/jamanetworkopen.2021.20360>.
- Opitz, I. (2014). Management of malignant pleural mesothelioma—The European experience. *J. Thorac. Dis.* 6, S238–S252. <https://doi.org/10.3978/j.issn.2072-1439.2014.05.03>.
- Vogelzang, N.J., Rusthoven, J.J., Symanowski, J., Denham, C., Kaukel, E., Ruffie, P., Gatzemeier, U., Boyer, M., Emri, S., Manegold, C., et al. (2003). Phase III study of pemetrexed in combination with cisplatin versus cisplatin alone in patients with malignant pleural mesothelioma. *J. Clin. Oncol.* 21, 2636–2644. <https://doi.org/10.1200/JCO.2003.11.136>.
- Ceresoli, G.L., Zucali, P.A., Favaretto, A.G., Grossi, F., Bidoli, P., Del Conte, G., Ceribelli, A., Bearz, A., Morengi, E., Cavina, R., et al. (2006). Phase II study of pemetrexed plus carboplatin in malignant pleural mesothelioma. *J. Clin. Oncol.* 24, 1443–1448. <https://doi.org/10.1200/JCO.2005.04.3190>.
- Borea, F., Franczak, M.A., Garcia, M., Perrino, M., Cordua, N., Smolenski, R.T., Peters, G.J., Dziadziuszko, R., Santoro, A., Zucali, P.A., and Giovannetti, E. (2023). Target Therapy in Malignant Pleural Mesothelioma: Hope or Mirage? *Int. J. Mol. Sci.* 24, 9165. <https://doi.org/10.3390/ijms24119165>.
- Oehl, K., Vrugt, B., Opitz, I., and Meerang, M. (2018). Heterogeneity in Malignant Pleural Mesothelioma. *Int. J. Mol. Sci.* 19, 1603. <https://doi.org/10.3390/ijms19061603>.
- Baas, P., Scherpereel, A., Nowak, A.K., Fujimoto, N., Peters, S., Tsao, A.S., Mansfield, A.S., Popat, S., Jahan, T., Antonia, S., et al. (2021). First-line nivolumab plus ipilimumab in unresectable malignant pleural mesothelioma (CheckMate 743): a multicentre, randomised, open-label, phase 3 trial. *Lancet* 397, 375–386. [https://doi.org/10.1016/S0140-6736\(20\)32714-8](https://doi.org/10.1016/S0140-6736(20)32714-8).
- Davis, A., Ke, H., Kao, S., and Pavlakis, N. (2022). An Update on Emerging Therapeutic Options for Malignant Pleural Mesothelioma. *Lung Cancer* 173, 1–12. <https://doi.org/10.2147/LCMT.S288535>.
- Harvey, K., and Tapon, N. (2007). The Salvador-Warts-Hippo pathway - an emerging tumour-suppressor network. *Nat. Rev. Cancer* 7, 182–191. <https://doi.org/10.1038/nrc2070>.
- Johnson, R., and Halder, G. (2014). The two faces of Hippo: targeting the Hippo pathway for regenerative medicine and cancer treatment. *Nat. Rev. Drug Discov.* 13, 63–79. <https://doi.org/10.1038/nrd4161>.
- Yu, F.X., Zhao, B., and Guan, K.L. (2015). Hippo Pathway in Organ Size Control, Tissue Homeostasis, and Cancer. *Cell* 163, 811–828. <https://doi.org/10.1016/j.cell.2015.10.044>.
- Zanconato, F., Cordenonsi, M., and Piccolo, S. (2016). YAP/TAZ at the Roots of Cancer. *Cancer Cell* 29, 783–803. <https://doi.org/10.1016/j.ccell.2016.05.005>.
- Zheng, Y., and Pan, D. (2019). The Hippo Signaling Pathway in Development and Disease. *Dev. Cell* 50, 264–282. <https://doi.org/10.1016/j.devcel.2019.06.003>.
- Hong, W., and Guan, K.L. (2012). The YAP and TAZ transcription co-activators: key downstream effectors of the mammalian Hippo pathway. *Semin. Cell Dev. Biol.* 23, 785–793. <https://doi.org/10.1016/j.semcdb.2012.05.004>.
- Maugeri-Sacca, M., Barba, M., Pizzuti, L., Vici, P., Di Lauro, L., Dattilo, R., Vitale, I., Bartucci, M., Mottolese, M., and De Maria, R. (2015). The Hippo transducers TAZ and YAP in breast cancer: oncogenic activities and clinical implications. *Exp. Rev. Mol. Med.* 17, e14. <https://doi.org/10.1017/erm.2015.12>.
- Harvey, K.F., Zhang, X., and Thomas, D.M. (2013). The Hippo pathway and human cancer. *Nat. Rev. Cancer* 13, 246–257. <https://doi.org/10.1038/nrc3458>.
- Mo, J.S., Park, H.W., and Guan, K.L. (2014). The Hippo signaling pathway in stem cell biology and cancer. *EMBO Rep.* 15, 642–656. <https://doi.org/10.15252/embr.201438638>.
- Chan, S.W., Lim, C.J., Guo, K., Ng, C.P., Lee, I., Hunziker, W., Zeng, Q., and Hong, W. (2008). A role for TAZ in migration, invasion, and tumorigenesis of breast cancer cells. *Cancer Res.* 68, 2592–2598. <https://doi.org/10.1158/0008-5472.CAN-07-2696>.
- Zender, L., Spector, M.S., Xue, W., Flemming, P., Cordon-Cardo, C., Silke, J., Fan, S.T., Luk, J.M., Wigler, M., Hannon, G.J., et al. (2006). Identification and validation of oncogenes in liver cancer using an integrative oncogenomic approach. *Cell* 125, 1253–1267. <https://doi.org/10.1016/j.cell.2006.05.030>.
- Zhou, Z., Hao, Y., Liu, N., Raptis, L., Tsao, M.S., and Yang, X. (2011). TAZ is a novel oncogene in non-small cell lung cancer. *Oncogene* 30, 2181–2186. <https://doi.org/10.1038/onc.2010.606>.
- Zhang, W., Nandakumar, N., Shi, Y., Manzano, M., Smith, A., Graham, G., Gupta, S., Vietsch, E.E., Laughlin, S.Z., Wadhwa, M., et al. (2014). Downstream of mutant KRAS, the transcription regulator YAP is essential for neoplastic progression to pancreatic ductal adenocarcinoma. *Sci. Signal.* 7, ra42. <https://doi.org/10.1126/scisignal.2005049>.
- Li, Q., Li, S., Mana-Capelli, S., Roth Flach, R.J., Danaei, L.V., Amcheslavsky, A., Nie, Y., Kaneko, S., Yao, X., Chen, X., et al. (2014). The conserved misshapen-warts-Yorkie pathway acts in enteroblasts to regulate intestinal stem cells in Drosophila. *Dev. Cell* 31, 291–304. <https://doi.org/10.1016/j.devcel.2014.09.012>.
- Li, S., Cho, Y.S., Yue, T., Ip, Y.T., and Jiang, J. (2015). Overlapping functions of the MAP4K family kinases Hppy and Msn in Hippo signaling. *Cell Discov.* 1, 15038. <https://doi.org/10.1038/celldisc.2015.38>.
- Meng, Z., Moroishi, T., Mottier-Pavie, V., Plouffe, S.W., Hansen, C.G., Hong, A.W., Park, H.W., Mo, J.S., Lu, W., Lu, S., et al. (2015). MAP4K family kinases act in parallel to MST1/2 to activate LATS1/2 in the Hippo pathway. *Nat. Commun.* 6, 8357. <https://doi.org/10.1038/ncomms9357>.
- Zheng, Y., Wang, W., Liu, B., Deng, H., Uster, E., and Pan, D. (2015). Identification of Happyhour/MAP4K as Alternative Hpo/Mst-like Kinases in the Hippo Kinase Cascade. *Dev. Cell* 34, 642–655. <https://doi.org/10.1016/j.devcel.2015.08.014>.
- Qi, S., Zhu, Y., Liu, X., Li, P., Wang, Y., Zeng, Y., Yu, A., Wang, Y., Sha, Z., Zhong, Z., et al. (2022). WWC proteins mediate LATS1/2 activation by Hippo kinases and imply a tumor suppression strategy. *Mol. Cell* 82, 1850–1864.e7. <https://doi.org/10.1016/j.molcel.2022.03.027>.
- Qi, S., Zhong, Z., Zhu, Y., Wang, Y., Ma, M., Wang, Y., Liu, X., Jin, R., Jiao, Z., Zhu, R., et al. (2023). Two Hippo signaling modules orchestrate liver

- size and tumorigenesis. *EMBO J.* 42, e112126. <https://doi.org/10.15252/embj.2022112126>.
32. Lai, Z.C., Wei, X., Shimizu, T., Ramos, E., Rohrbaugh, M., Nikolaidis, N., Ho, L.L., and Li, Y. (2005). Control of cell proliferation and apoptosis by mob as tumor suppressor, mats. *Cell* 120, 675–685. <https://doi.org/10.1016/j.cell.2004.12.036>.
  33. Wei, X., Shimizu, T., and Lai, Z.C. (2007). Mob as tumor suppressor is activated by Hippo kinase for growth inhibition in *Drosophila*. *EMBO J.* 26, 1772–1781. <https://doi.org/10.1038/sj.emboj.7601630>.
  34. Zhang, N., Bai, H., David, K.K., Dong, J., Zheng, Y., Cai, J., Giovannini, M., Liu, P., Anders, R.A., and Pan, D. (2010). The Merlin/NF2 tumor suppressor functions through the YAP oncoprotein to regulate tissue homeostasis in mammals. *Dev. Cell* 19, 27–38. <https://doi.org/10.1016/j.devcel.2010.06.015>.
  35. Murakami, H., Mizuno, T., Taniguchi, T., Fujii, M., Ishiguro, F., Fukui, T., Akatsuka, S., Horio, Y., Hida, T., Kondo, Y., et al. (2011). LATS2 is a tumor suppressor gene of malignant mesothelioma. *Cancer Res.* 71, 873–883. <https://doi.org/10.1158/0008-5472.CAN-10-2164>.
  36. Zhong, Z., Jiao, Z., and Yu, F.X. (2024). The Hippo signaling pathway in development and regeneration. *Cell Rep.* 43, 113926. <https://doi.org/10.1016/j.celrep.2024.113926>.
  37. Zhong, Z., Meng, Z., and Yu, F.-X. (2023). Reconstructing the Hippo signaling network. *Sci. Bull.* 68, 2307–2310. <https://doi.org/10.1016/j.scib.2023.08.048>.
  38. Cheng, J.Q., Jhanwar, S.C., Klein, W.M., Bell, D.W., Lee, W.C., Altomare, D.A., Nobori, T., Olopade, O.I., Buckler, A.J., and Testa, J.R. (1994). p16 alterations and deletion mapping of 9p21-p22 in malignant mesothelioma. *Cancer Res.* 54, 5547–5551.
  39. Sekido, Y., Pass, H.I., Bader, S., Mew, D.J., Christman, M.F., Gazdar, A.F., and Minna, J.D. (1995). Neurofibromatosis type 2 (NF2) gene is somatically mutated in mesothelioma but not in lung cancer. *Cancer Res.* 55, 1227–1231.
  40. Bott, M., Brevet, M., Taylor, B.S., Shimizu, S., Ito, T., Wang, L., Creaney, J., Lake, R.A., Zakowski, M.F., Reva, B., et al. (2011). The nuclear deubiquitinase BAP1 is commonly inactivated by somatic mutations and 3p21.1 losses in malignant pleural mesothelioma. *Nat. Genet.* 43, 668–672. <https://doi.org/10.1038/ng.855>.
  41. Badhai, J., Pandey, G.K., Song, J.Y., Krijgsman, O., Bhaskaran, R., Chandrasekaran, G., Kwon, M.C., Bombardelli, L., Monkhorst, K., Grasso, C., et al. (2020). Combined deletion of Bap1, Nf2, and Cdkn2ab causes rapid onset of malignant mesothelioma in mice. *J. Exp. Med.* 217, e20191257. <https://doi.org/10.1084/jem.20191257>.
  42. Hmeljak, J., Sanchez-Vega, F., Hoedley, K.A., Shih, J., Stewart, C., Heiman, D., Tarpey, P., Danilova, L., Drill, E., Gibb, E.A., et al. (2018). Integrative Molecular Characterization of Malignant Pleural Mesothelioma. *Cancer Discov.* 8, 1548–1565. <https://doi.org/10.1158/2159-8290.CD-18-0804>.
  43. Bueno, R., Stawiski, E.W., Goldstein, L.D., Durinck, S., De Rienzo, A., Modrusan, Z., Gnad, F., Nguyen, T.T., Jaiswal, B.S., Chirieac, L.R., et al. (2016). Comprehensive genomic analysis of malignant pleural mesothelioma identifies recurrent mutations, gene fusions and splicing alterations. *Nat. Genet.* 48, 407–416. <https://doi.org/10.1038/ng.3520>.
  44. Jongsma, J., van Montfort, E., Vooijs, M., Zevenhoven, J., Krimpenfort, P., van der Valk, M., van de Vijver, M., and Berns, A. (2008). A conditional mouse model for malignant mesothelioma. *Cancer Cell* 13, 261–271. <https://doi.org/10.1016/j.ccr.2008.01.030>.
  45. Hakiri, S., Osada, H., Ishiguro, F., Murakami, H., Murakami-Tonami, Y., Yokoi, K., and Sekido, Y. (2015). Functional differences between wild-type and mutant-type BRCA1-associated protein 1 tumor suppressor against malignant mesothelioma cells. *Cancer Sci.* 106, 990–999. <https://doi.org/10.1111/cas.12698>.
  46. Holden, J.K., and Cunningham, C.N. (2018). Targeting the Hippo Pathway and Cancer through the TEAD Family of Transcription Factors. *Cancers* 10, 81. <https://doi.org/10.3390/cancers10030081>.
  47. Lin, K.C., Park, H.W., and Guan, K.L. (2017). Regulation of the Hippo Pathway Transcription Factor TEAD. *Trends Biochem. Sci.* 42, 862–872. <https://doi.org/10.1016/j.tibs.2017.09.003>.
  48. Pobbati, A.V., Kumar, R., Rubin, B.P., and Hong, W. (2023). Therapeutic targeting of TEAD transcription factors in cancer. *Trends Biochem. Sci.* 48, 450–462. <https://doi.org/10.1016/j.tibs.2022.12.005>.
  49. Liu-Chittenden, Y., Huang, B., Shim, J.S., Chen, Q., Lee, S.J., Anders, R.A., Liu, J.O., and Pan, D. (2012). Genetic and pharmacological disruption of the TEAD-YAP complex suppresses the oncogenic activity of YAP. *Genes Dev.* 26, 1300–1305. <https://doi.org/10.1101/gad.192856.112>.
  50. Zhao, B., Kim, J., Ye, X., Lai, Z.C., and Guan, K.L. (2009). Both TEAD-binding and WW domains are required for the growth stimulation and oncogenic transformation activity of yes-associated protein. *Cancer Res.* 69, 1089–1098. <https://doi.org/10.1158/0008-5472.CAN-08-2997>.
  51. Tang, T.T., Konradi, A.W., Feng, Y., Peng, X., Ma, M., Li, J., Yu, F.X., Guan, K.L., and Post, L. (2021). Small Molecule Inhibitors of TEAD Auto-palmitoylation Selectively Inhibit Proliferation and Tumor Growth of NF2-deficient Mesothelioma. *Mol. Cancer Therapeut.* 20, 986–998. <https://doi.org/10.1158/1535-7163.MCT-20-0717>.
  52. Metcalf, R.A., Welsh, J.A., Bennett, W.P., Seddon, M.B., Lehman, T.A., Pelin, K., Linnainmaa, K., Tammilehto, L., Mattson, K., Gerwin, B.I., et al. (1992). p53 and Kirsten-ras mutations in human mesothelioma cell lines. *Cancer Res.* 52, 2610–2615.
  53. Sementino, E., Menges, C.W., Kadariya, Y., Peri, S., Xu, J., Liu, Z., Wilkes, R.G., Cai, K.Q., Rauscher, F.J., 3rd, Klein-Szanto, A.J., and Testa, J.R. (2018). Inactivation of Tp53 and Pten drives rapid development of pleural and peritoneal malignant mesotheliomas. *J. Cell. Physiol.* 233, 8952–8961. <https://doi.org/10.1002/jcp.26830>.
  54. Kim, J.E., Kim, D., Hong, Y.S., Kim, K.P., Yoon, Y.K., Lee, D.H., Kim, S.W., Chun, S.M., Jang, S.J., and Kim, T.W. (2018). Mutational Profiling of Malignant Mesothelioma Revealed Potential Therapeutic Targets in EGFR and NRAS. *Transl. Oncol.* 11, 268–274. <https://doi.org/10.1016/j.tranon.2018.01.005>.
  55. Naso, M.F., Tomkowicz, B., Perry, W.L., 3rd, and Strohl, W.R. (2017). Adeno-Associated Virus (AAV) as a Vector for Gene Therapy. *BioDrugs* 31, 317–334. <https://doi.org/10.1007/s40259-017-0234-5>.
  56. Cunningham, R., Jia, S., Purohit, K., Salem, O., Hui, N.S., Lin, Y., Carragher, N.O., and Hansen, C.G. (2023). YAP/TAZ activation predicts clinical outcomes in mesothelioma and is conserved in in vitro model of driver mutations. *Clin. Transl. Med.* 13, e1190. <https://doi.org/10.1002/ctm2.1190>.
  57. Miyayama, A., Masuda, M., Tsuta, K., Kawasaki, K., Nakamura, Y., Sakuma, T., Asamura, H., Gemma, A., and Yamada, T. (2015). Hippo pathway gene mutations in malignant mesothelioma: revealed by RNA and targeted exon sequencing. *J. Thorac. Oncol.* 10, 844–851. <https://doi.org/10.1097/JTO.0000000000000493>.
  58. Tranchant, R., Quétel, L., Tallet, A., Meiller, C., Renier, A., de Koning, L., de Reynies, A., Le Pimpec-Barthes, F., Zucman-Rossi, J., Jaurand, M.C., and Jean, D. (2017). Co-occurring Mutations of Tumor Suppressor Genes, LATS2 and NF2, in Malignant Pleural Mesothelioma. *Clin. Cancer Res.* 23, 3191–3202. <https://doi.org/10.1158/1078-0432.CCR-16-1971>.
  59. Sato, T., and Sekido, Y. (2018). NF2/Merlin Inactivation and Potential Therapeutic Targets in Mesothelioma. *Int. J. Mol. Sci.* 19, 988. <https://doi.org/10.3390/ijms19040988>.
  60. Hiltbrunner, S., Fleischmann, Z., Sokol, E.S., Zoche, M., Felley-Bosco, E., and Curioni-Fontecedro, A. (2022). Genomic landscape of pleural and peritoneal mesothelioma tumours. *Br. J. Cancer* 127, 1997–2005. <https://doi.org/10.1038/s41416-022-01979-0>.
  61. Yang, H., Hall, S.R.R., Sun, B., Zhao, L., Gao, Y., Schmid, R.A., Tan, S.T., Peng, R.W., and Yao, F. (2021). NF2 and Canonical Hippo-YAP Pathway

- Define Distinct Tumor Subsets Characterized by Different Immune Deficiency and Treatment Implications in Human Pleural Mesothelioma. *Cancers* 13, 1561. <https://doi.org/10.3390/cancers13071561>.
62. Gong, R., and Yu, F.X. (2015). Targeting the Hippo Pathway for Anti-cancer Therapies. *Curr. Med. Chem.* 22, 4104–4117. <https://doi.org/10.2174/0929867322666151002112256>.
  63. Nakatani, K., Maehama, T., Nishio, M., Goto, H., Kato, W., Omori, H., Miyachi, Y., Togashi, H., Shimono, Y., and Suzuki, A. (2017). Targeting the Hippo signalling pathway for cancer treatment. *J. Biochem.* 161, 237–244. <https://doi.org/10.1093/jb/mvw074>.
  64. Dey, A., Varelas, X., and Guan, K.L. (2020). Targeting the Hippo pathway in cancer, fibrosis, wound healing and regenerative medicine. *Nat. Rev. Drug Discov.* 19, 480–494. <https://doi.org/10.1038/s41573-020-0070-z>.
  65. Nouri, K., Azad, T., Ling, M., Janse van Rensburg, H.J., Pipchuk, A., Shen, H., Hao, Y., Zhang, J., and Yang, X. (2019). Identification of Celestrol as a Novel YAP-TEAD Inhibitor for Cancer Therapy by High Throughput Screening with Ultrasensitive YAP/TAZ-TEAD Biosensors. *Cancers* 11, 1596. <https://doi.org/10.3390/cancers11101596>.
  66. Jiao, S., Wang, H., Shi, Z., Dong, A., Zhang, W., Song, X., He, F., Wang, Y., Zhang, Z., Wang, W., et al. (2014). A peptide mimicking VGLL4 function acts as a YAP antagonist therapy against gastric cancer. *Cancer Cell* 25, 166–180. <https://doi.org/10.1016/j.ccr.2014.01.010>.
  67. Pobbati, A.V., Han, X., Hung, A.W., Weiguang, S., Huda, N., Chen, G.Y., Kang, C., Chia, C.S.B., Luo, X., Hong, W., and Poulsen, A. (2015). Targeting the Central Pocket in Human Transcription Factor TEAD as a Potential Cancer Therapeutic Strategy. *Structure* 23, 2076–2086. <https://doi.org/10.1016/j.str.2015.09.009>.
  68. Bum-Erdene, K., Zhou, D., Gonzalez-Gutierrez, G., Ghozayel, M.K., Si, Y., Xu, D., Shannon, H.E., Bailey, B.J., Corson, T.W., Pollok, K.E., et al. (2019). Small-Molecule Covalent Modification of Conserved Cysteine Leads to Allosteric Inhibition of the TEAD-Yap Protein-Protein Interaction. *Cell Chem. Biol.* 26, 378–389.e13. <https://doi.org/10.1016/j.chembiol.2018.11.010>.
  69. Kaneda, A., Seike, T., Danjo, T., Nakajima, T., Otsubo, N., Yamaguchi, D., Tsuji, Y., Hamaguchi, K., Yasunaga, M., Nishiya, Y., et al. (2020). The novel potent TEAD inhibitor, K-975, inhibits YAP1/TAZ-TEAD protein-protein interactions and exerts an anti-tumor effect on malignant pleural mesothelioma. *Am. J. Cancer Res.* 10, 4399–4415.
  70. Holden, J.K., Crawford, J.J., Noland, C.L., Schmidt, S., Zbieg, J.R., Lacap, J.A., Zang, R., Miller, G.M., Zhang, Y., Beroza, P., et al. (2020). Small Molecule Dysregulation of TEAD Lipidation Induces a Dominant-Negative Inhibition of Hippo Pathway Signaling. *Cell Rep.* 31, 107809. <https://doi.org/10.1016/j.celrep.2020.107809>.
  71. Pease, D.F., and Kratzke, R.A. (2017). Oncolytic Viral Therapy for Mesothelioma. *Front. Oncol.* 7, 179. <https://doi.org/10.3389/fonc.2017.00179>.
  72. Yang, H., Xu, D., Gao, Y., Schmid, R.A., and Peng, R.W. (2020). Oncolytic Viral Therapy for Malignant Pleural Mesothelioma. *J. Thorac. Oncol.* 15, e111–e113. <https://doi.org/10.1016/j.jtho.2020.03.007>.
  73. Vachani, A., Moon, E., and Albelda, S.M. (2011). Gene therapy for mesothelioma. *Curr. Treat. Options Oncol.* 12, 173–180. <https://doi.org/10.1007/s11864-011-0153-5>.
  74. Zhang, L., Iyer, J., Chowdhury, A., Ji, M., Xiao, L., Yang, S., Chen, Y., Tsai, M.Y., and Dong, J. (2012). KIBRA regulates aurora kinase activity and is required for precise chromosome alignment during mitosis. *J. Biol. Chem.* 287, 34069–34077. <https://doi.org/10.1074/jbc.M112.385518>.
  75. Sanjana, N.E., Shalem, O., and Zhang, F. (2014). Improved vectors and genome-wide libraries for CRISPR screening. *Nat. Methods* 11, 783–784. <https://doi.org/10.1038/nmeth.3047>.
  76. Yu, F.X., Zhao, B., Panupinthu, N., Jewell, J.L., Lian, I., Wang, L.H., Zhao, J., Yuan, H., Tumaneng, K., Li, H., et al. (2012). Regulation of the Hippo-YAP pathway by G-protein-coupled receptor signaling. *Cell* 150, 780–791. <https://doi.org/10.1016/j.cell.2012.06.037>.
  77. Wang, Y., Zhu, Y., Gu, Y., Ma, M., Wang, Y., Qi, S., Zeng, Y., Zhu, R., Wang, X., Yu, P., et al. (2021). Stabilization of Motin family proteins in NF2-deficient cells prevents full activation of YAP/TAZ and rapid tumorigenesis. *Cell Rep.* 36, 109596. <https://doi.org/10.1016/j.celrep.2021.109596>.
  78. Ji, S., Liu, Q., Zhang, S., Chen, Q., Wang, C., Zhang, W., Xiao, C., Li, Y., Nian, C., Li, J., et al. (2019). FGF15 Activates Hippo Signaling to Suppress Bile Acid Metabolism and Liver Tumorigenesis. *Dev. Cell* 48, 460–474.e9. <https://doi.org/10.1016/j.devcel.2018.12.021>.
  79. Li, F., Han, X., Li, F., Wang, R., Wang, H., Gao, Y., Wang, X., Fang, Z., Zhang, W., Yao, S., et al. (2015). LKB1 Inactivation Elicits a Redox Imbalance to Modulate Non-small Cell Lung Cancer Plasticity and Therapeutic Response. *Cancer Cell* 27, 698–711. <https://doi.org/10.1016/j.ccell.2015.04.001>.
  80. Jacks, T., Remington, L., Williams, B.O., Schmitt, E.M., Halachmi, S., Bronson, R.T., and Weinberg, R.A. (1994). Tumor spectrum analysis in p53-mutant mice. *Curr. Biol.* 4, 1–7. [https://doi.org/10.1016/s0960-9822\(00\)00002-6](https://doi.org/10.1016/s0960-9822(00)00002-6).
  81. Meuwissen, R., Linn, S.C., van der Valk, M., Mooi, W.J., and Berns, A. (2001). Mouse model for lung tumorigenesis through Cre/lox controlled sporadic activation of the K-Ras oncogene. *Oncogene* 20, 6551–6558. <https://doi.org/10.1038/sj.onc.1204837>.
  82. Ran, F.A., Hsu, P.D., Wright, J., Agarwala, V., Scott, D.A., and Zhang, F. (2013). Genome engineering using the CRISPR-Cas9 system. *Nat. Protoc.* 8, 2281–2308. <https://doi.org/10.1038/nprot.2013.143>.

## STAR★METHODS

### KEY RESOURCES TABLE

| REAGENT or RESOURCE                                           | SOURCE                       | IDENTIFIER                      |
|---------------------------------------------------------------|------------------------------|---------------------------------|
| <b>Antibodies</b>                                             |                              |                                 |
| Rabbit monoclonal anti-Merlin (D3S3W)                         | Cell Signaling Technology    | Cat#12888S; RRID: AB_2650551    |
| Rabbit monoclonal anti-LATS1(C66B5)                           | Cell Signaling Technology    | Cat#3477S; RRID: AB_2133513     |
| Rabbit monoclonal anti-LATS2(D83D6)                           | Cell Signaling Technology    | Cat#5888S; RRID: AB_10835233    |
| Rabbit monoclonal anti-SAV1(D6M6X)                            | Cell Signaling Technology    | Cat#13301S; RRID: AB_2798176    |
| Mouse monoclonal anti-WWC1                                    | Zhang et al. <sup>74</sup>   | N/A                             |
| Rabbit polyclonal anti-WWC2                                   | Abcam                        | Cat#ab126356; RRID: AB_11140331 |
| Rabbit polyclonal anti-WWC3                                   | Qi et al. <sup>30</sup>      | N/A                             |
| Rabbit monoclonal anti-YAP(D8H1X)                             | Cell Signaling Technology    | Cat#14074S; RRID: AB_2650491    |
| Rabbit monoclonal anti-Vinculin(E1E9V)                        | Cell Signaling Technology    | Cat#13901S; RRID: AB_2728768    |
| Rabbit monoclonal anti-Phospho-YAP(Ser127)                    | Cell Signaling Technology    | Cat#13008; RRID: AB_2650553     |
| Rabbit monoclonal anti-Non-phospho(Active) YAP(Ser127)(E6U8Z) | Cell Signaling Technology    | Cat#29495; RRID: AB_2798974     |
| Rabbit polyclonal anti-CYR61(H-78)                            | Santa Cruz Biotechnology     | Cat#sc-13100; RRID: AB_2088733  |
| Rabbit polyclonal anti-Ki67                                   | Abcam                        | Cat#ab15580; RRID: AB_443209    |
| Mouse monoclonal anti-YAP1(63.7)                              | Santa Cruz Biotechnology     | Cat#sc-101199; RRID: AB_1131430 |
| Rabbit monoclonal anti-WT1                                    | Cell Signaling Technology    | Cat#83535; RRID: AB_2800020     |
| Rabbit polyclonal anti-Mesothelin                             | Thermo Fisher Scientific     | Cat#PA5-79698; RRID: AB_2746813 |
| Rabbit monoclonal anti-Flag tag (D6W5B)                       | Cell Signaling Technology    | Cat#14793S; RRID: AB_2572291    |
| Mouse monoclonal anti-FLAG M2(HRP conjugated)                 | Sigma-Aldrich                | Cat#A8592; RRID: AB_439702      |
| Rabbit monoclonal anti-Phospho-LATS1(Thr1079)(D57D3)          | Cell Signaling Technology    | Cat#8654S; RRID: AB_10971635    |
| Mouse monoclonal anti-Myc Tag                                 | MBL International            | Cat#M192-3; RRID: AB_11160947   |
| Mouse monoclonal anti-GAPDH(HRP conjugated)                   | Abways Technology            | Cat#AB2000                      |
| Goat polyclonal anti-CTGF(L-20)                               | Santa Cruz Biotechnology     | Cat#sc-14939; RRID: AB_638805   |
| Goat anti-rabbit IgG antibody, Alexa Fluor 488                | Thermo Fisher Scientific     | Cat#A11001; RRID: AB_2534069    |
| <b>Bacterial and virus strains</b>                            |                              |                                 |
| <i>Trans5α</i> Chemically Competent Cell                      | TransGen Biotech             | Cat#CD201-01                    |
| pLVX lentivirus                                               | This paper                   | N/A                             |
| LentiCRISPR v2                                                | Sanjana et al. <sup>75</sup> | Addgene 52961                   |
| Adeno-Cre                                                     | HANBIO                       | Cat#HBAD-1010                   |
| Adeno-associated virus (AAV)                                  | This paper                   | N/A                             |
| <b>Chemicals, peptides, and recombinant proteins</b>          |                              |                                 |
| DAPI                                                          | Sigma-Aldrich                | Cat#D9542                       |
| Fetal bovine serum                                            | Invitrogen                   | Cat#10091-148                   |
| Protease inhibitor cocktail                                   | MCE                          | Cat#HY-K0010                    |
| Phosphatase inhibitor Cocktail I                              | MCE                          | Cat#HY-K0021                    |
| Phosphatase inhibitor Cocktail II                             | MCE                          | Cat#HY-K0022                    |
| Phosphatase inhibitor Cocktail II                             | MCE                          | Cat#HY-K0022                    |
| PEI                                                           | Polysciences                 | Cat#23966-2                     |
| PolyJet                                                       | Signagen Laboratories        | Cat#SL100688                    |
| Envision anti-Rabbit                                          | DAKO                         | Cat#K4002                       |
| DAB reagent                                                   | GeneTech                     | GK500705                        |
| Prime STAR Max DNA polymerase                                 | Takara                       | Cat#R045A                       |
| VT103                                                         | Selleck                      | Cat#E1598                       |
| VT107                                                         | Selleck                      | Cat#E1599                       |

(Continued on next page)

**Continued**

| REAGENT or RESOURCE                                                                                                                                    | SOURCE                                             | IDENTIFIER                                                                                                                                               |
|--------------------------------------------------------------------------------------------------------------------------------------------------------|----------------------------------------------------|----------------------------------------------------------------------------------------------------------------------------------------------------------|
| <b>Critical commercial assays</b>                                                                                                                      |                                                    |                                                                                                                                                          |
| TaKaRa MiniBEST Universal RNA Extraction Kit                                                                                                           | Takara                                             | Cat#9767                                                                                                                                                 |
| TB Green® <i>Premix Ex Taq</i> <sup>TM</sup> (Tli RNaseH Plus)                                                                                         | Takara                                             | Cat#RR420A                                                                                                                                               |
| <i>TransScript</i> ® First-Strand cDNA Synthesis SuperMix                                                                                              | TransGen Biotech                                   | Cat#AT301-03                                                                                                                                             |
| ClonExpress MultiS One Step Cloning Kit                                                                                                                | Vazyme                                             | Cat#C113-02                                                                                                                                              |
| High-sig ECL Western Blotting                                                                                                                          | Tanon                                              | Car#180-501                                                                                                                                              |
| Cell Counting Kit(CCK-8)                                                                                                                               | YEASEN                                             | Cat#40203ES60                                                                                                                                            |
| <b>Deposited data</b>                                                                                                                                  |                                                    |                                                                                                                                                          |
| TCGA Mesothelioma data                                                                                                                                 | Hmeljak et al. <sup>42</sup>                       | <a href="https://portal.gdc.cancer.gov/projects/TCGA-MESO">https://portal.gdc.cancer.gov/projects/TCGA-MESO</a> , dbGap Study Accession:phs000178.v11.p8 |
| <b>Experimental models: Cell lines</b>                                                                                                                 |                                                    |                                                                                                                                                          |
| Human: HEK293A                                                                                                                                         | Yu et al. <sup>76</sup>                            | N/A                                                                                                                                                      |
| Human: HEK293T                                                                                                                                         | National collection of Authenticated Cell Cultures | Cat#SCSP-502                                                                                                                                             |
| Human: NCI-H2452                                                                                                                                       | Tang et al. <sup>51</sup>                          | N/A                                                                                                                                                      |
| Human: NCI-H2373                                                                                                                                       | Tang et al. <sup>51</sup>                          | N/A                                                                                                                                                      |
| Human: NCI-H2052                                                                                                                                       | Tang et al. <sup>51</sup>                          | N/A                                                                                                                                                      |
| HEK293A <i>NF2</i> KO                                                                                                                                  | Qi et al. <sup>30</sup>                            | N/A                                                                                                                                                      |
| <b>Experimental models: Organisms/strains</b>                                                                                                          |                                                    |                                                                                                                                                          |
| Mouse: <i>Nf2</i> <sup>fl/fl</sup> (C57/BL6J background)                                                                                               | Wang et al. <sup>77</sup>                          | N/A                                                                                                                                                      |
| Mouse: <i>Sav</i> <sup>fl/fl</sup> (C57/BL6J background)                                                                                               | Ji et al. <sup>78</sup>                            | N/A                                                                                                                                                      |
| Mouse: <i>Wwc1</i> <sup>fl/fl</sup> ; <i>Wwc2</i> <sup>fl/fl</sup> (C57/BL6J background)                                                               | Qi et al. <sup>31</sup>                            | N/A                                                                                                                                                      |
| Mouse: <i>Nf2</i> <sup>fl/fl</sup> ; <i>Sav</i> <sup>fl/fl</sup> (C57/BL6J background)                                                                 | Qi et al. <sup>31</sup>                            | N/A                                                                                                                                                      |
| Mouse: <i>Nf2</i> <sup>fl/fl</sup> ; <i>Wwc1</i> <sup>fl/fl</sup> ; <i>Wwc2</i> <sup>fl/fl</sup> (C57/BL6J background)                                 | Qi et al. <sup>31</sup>                            | N/A                                                                                                                                                      |
| Mouse: <i>Nf2</i> <sup>fl/fl</sup> ; <i>Trp53</i> <sup>fl/fl</sup> (C57/BL6J background)                                                               | This paper                                         | N/A                                                                                                                                                      |
| Mouse: <i>Nf2</i> <sup>fl/fl</sup> ; <i>Trp53</i> <sup>fl/fl</sup> ; <i>Wwc1</i> <sup>fl/fl</sup> ; <i>Wwc2</i> <sup>fl/fl</sup> (C57/BL6J background) | This paper                                         | N/A                                                                                                                                                      |
| Mouse: <i>SuperHippo</i> <sup>fl/fl</sup> (C57/BL6J background)                                                                                        | Qi et al. <sup>30</sup>                            | N/A                                                                                                                                                      |
| Mouse: <i>Nf2</i> <sup>fl/fl</sup> ; <i>Trp53</i> <sup>fl/fl</sup> ; <i>SuperHippo</i> <sup>fl/+</sup> (C57/BL6J background)                           | This paper                                         | N/A                                                                                                                                                      |
| <b>Oligonucleotides</b>                                                                                                                                |                                                    |                                                                                                                                                          |
| <i>WWC1</i> siRNA: 5'-GGUUGGAGAUUACUUCUAUGA-3'                                                                                                         | This paper                                         | N/A                                                                                                                                                      |
| <i>WWC2</i> siRNA: 5'-GGAUCUUCUCCAGUACUAAA-3'                                                                                                          | This paper                                         | N/A                                                                                                                                                      |
| <i>WWC3</i> siRNA: 5'-GGAUUAUCAAACAAUACAAAG-3'                                                                                                         | This paper                                         | N/A                                                                                                                                                      |
| RT-qPCR primer <i>GAPDH</i> forward<br>5'-ATGGGAAGGTGAAGGTCG-3'                                                                                        | This paper                                         | N/A                                                                                                                                                      |
| RT-qPCR primer <i>GAPDH</i> reverse<br>5'-GGGGTCATTGATGGCAACAATA-3'                                                                                    | This paper                                         | N/A                                                                                                                                                      |
| RT-qPCR primer <i>CTCF</i> forward<br>5'-CCAATGACAACGCCTCCTG-3'                                                                                        | Yu et al. <sup>76</sup>                            | N/A                                                                                                                                                      |
| RT-qPCR primer <i>CTCF</i> reverse<br>5'-TGGTGACGCCAGAAAGCTC-3'                                                                                        | Yu et al. <sup>76</sup>                            | N/A                                                                                                                                                      |
| RT-qPCR primer <i>CYR61</i> forward<br>5'-AGCCTCGCATCCTATACAACC-3'                                                                                     | Yu et al. <sup>76</sup>                            | N/A                                                                                                                                                      |
| RT-qPCR primer <i>CYR61</i> reverse<br>5'-TTCTTTCACAAGGCGGCACTC-3'                                                                                     | Yu et al. <sup>76</sup>                            | N/A                                                                                                                                                      |
| RT-qPCR primer <i>ANKRD1</i> forward<br>5'-CACTTCTAGCCCACCCTGTGA-3'                                                                                    | Yu et al. <sup>76</sup>                            | N/A                                                                                                                                                      |

(Continued on next page)

**Continued**

| REAGENT or RESOURCE                                                | SOURCE                  | IDENTIFIER                                                                                                            |
|--------------------------------------------------------------------|-------------------------|-----------------------------------------------------------------------------------------------------------------------|
| RT-qPCR primer <i>ANKRD1</i> reverse<br>5'-CCACAGGTTCGTAATGATTT-3' | Yu et al. <sup>76</sup> | N/A                                                                                                                   |
| <b>Recombinant DNA</b>                                             |                         |                                                                                                                       |
| pLVX-puro vector                                                   | Takara                  | #632164                                                                                                               |
| PsPAX2                                                             | Didier Trono            | Addgene #12260                                                                                                        |
| pMD.2g                                                             | Didier Trono            | Addgene #12259                                                                                                        |
| AAV2/6-CMV-3xFLAG-SuperHippo-P2A-NF2-WPRE                          | This paper              | N/A                                                                                                                   |
| AAV2/6-CMV-3xFLAG-NF2-WPRE                                         | This paper              | N/A                                                                                                                   |
| AAV2/6-CMV-3xFLAG-SuperHippo-WPRE                                  | This paper              | N/A                                                                                                                   |
| <b>Software and algorithms</b>                                     |                         |                                                                                                                       |
| GraphPad Prism 8                                                   | GraphPad                | <a href="https://www.graphpad.com/scientific-software/prism/">https://www.graphpad.com/scientific-software/prism/</a> |
| ImageJ                                                             | NIH                     | <a href="https://imagej.nih.gov/ij/">https://imagej.nih.gov/ij/</a>                                                   |
| R (version 3.6.2)                                                  | Open Source             | <a href="https://www.r-project.org/">https://www.r-project.org/</a>                                                   |

**EXPERIMENTAL MODEL AND STUDY PARTICIPANT DETAILS**

**Mouse models**

All procedures in animal experiments were approved by the Animal Ethics Committee of Shanghai Medical College, Fudan University, and performed in accordance with institutional guidelines. *Nf2<sup>fl/fl</sup>*, *Wwc1<sup>fl/fl</sup>*, *Wwc2<sup>fl/fl</sup>*, and *SuperHippo* (R26-e(CAG-LSL-3xFlag-SuperHippo)) mice were in-housed generated as described earlier.<sup>30,31,77</sup> The *Trp53* mice were described previously.<sup>79,80</sup> All mice used in this study were maintained in a specific pathogen-free facility under a 12-h light/dark cycle and provided ad libitum access to a standard rodent diet and water. Male and female mice were randomly used in this study unless otherwise indicated. For modeling mesotheliomas in mice, 4-week-old gene-floxed mice were intrathoracically injected with purified adenovirus harboring Cre recombinase driven by a CMV promoter (10<sup>9</sup> PFU for each mouse).<sup>41,81</sup> Briefly, virus particles were slowly released into the pleural space of mice with a 33-gauge needle inserted between the ribs, penetrating the chest wall at a depth of 2–3 mm (Figure 3A). Upon virus injection, mice were monitored daily and euthanized when they had weight loss or breathing abnormalities. Mouse lungs, hearts, and diaphragms were harvested, fixed in 4% formalin, paraffin-embedded, sectioned, and subjected to histological and pathological analysis.

**Cell lines and cell culture**

Mesothelioma cell lines NCI-H2452, NCI-H2052, and NCI-H2373 were cultured at early passages (less than 10) in RPMI-1640 medium (Gibco), supplemented with 10% fetal bovine serum (FBS) (Gibco or ExCell Bio) and 1% penicillin/streptomycin. Wild-type (WT) HEK293A and *NF2* knockout (KO) HEK293A cells were maintained in DMEM (Gibco) medium containing 10% FBS and 1% penicillin/streptomycin.<sup>31</sup> Cells were incubated in a 5% CO<sub>2</sub> incubator at 37°C. *SAV1* KO and *WWC1-3* tKO mesothelioma cell lines were generated in this study using the CRISPR/Cas9 system (below). The downregulation of target proteins in each cell line was confirmed by immunoblotting.

**METHOD DETAILS**

**CRISPR/Cas9 gene editing**

Gene-specific single-guide RNAs (sgRNAs) were designed using the CRISPR design tool at <http://www.genome-engineering.org/crispr>. The sgRNA sequences were cloned into the plasmid pSpCas9(BB)-2A-Puro (PX459) V2.0 (Addgene #62988), which was from Feng Zhang laboratory.<sup>82</sup> Cells transfected with CRISPR/Cas9 plasmids were selected by 2 μg/mL puromycin for 2 days. Pooled cells were used directly for experiments or seeded into 96-well plates (one cell per well) to establish monoclonal KO cells. The guide RNA sequences used were reported previously.<sup>31</sup>

**Transfection of plasmids, RNA interference, and lentivirus production**

Plasmids were transfected into HEK293A cells using PolyJet DNA *In Vitro* transfection Reagent (Signagen, #SL100688) according to the manufacturer's instructions. For RNA interference, 20 μM siRNA (GenePharma) and 3 μL Lipofectamine RNAiMAX (Life Technologies) were each diluted in 100 μL serum-free medium, mixed gently, and incubated for 10 min at room temperature; the mixture was added dropwise to plates with cells. Cells were incubated for 48–72 h before analysis. The detailed siRNA sequences are as

follows: siWWC1:5'-GGUUGGAGAUUACUUCUAGA-3'; siWWC2:5'-GGAUCUUCUCCAGUACUAAA-3'; siWWC3:5'-GGAUUU CAACAAAUACAAAG-3'. For lentivirus production, HEK293A cells were transfected with pLVX-based plasmids together with psPAX2 and pMD.2G packing vectors, and the medium-containing virus was collected and filtered for viral transduction.

### Immunoblotting

Proteins in cells or tissue lysates were resolved by sodium dodecyl sulfate-polyacrylamide gel electrophoresis (SDS-PAGE). Tissues and tumors were collected and lysed with RIPA buffer containing 0.1 mM PMSF. The total protein concentrations were determined using the BCA Protein Assay Kit (Cwbio, #CW0014S). Then proteins were transferred onto a nitrocellulose membrane, blocked with 5% skim milk in PBST, and incubated with primary antibodies in 5% bovine serum albumin (BSA) overnight at 4°C. Membranes were washed and incubated with HRP-coupled secondary antibodies for 1 h at room temperature. High-sig ECL Western Blotting Substrate (Tanon, #180-501) was added, and chemiluminescence was detected using a Tanon 5200S imaging system.

### RNA extraction, cDNA synthesis, and quantitative RT-PCR (qRT-PCR) analyses

The total RNA was extracted using the RNeasy Plus mini kit (Qiagen). The cDNA was synthesized using the PrimeScript RT kit (TaKaRa) according to the manufacturer's instructions. qRT-PCR was performed using SYBR Green qPCR Master Mix (TaKaRa) on a 7500 Real-Time PCR system (Applied Biosystems). All experiments were performed in triplicate and for at least three biological repeats. The changes in mRNA levels were determined using the  $\Delta\Delta CT$  method and normalized to the housekeeping gene *GAPDH*. Primers used in PCR were as follows: *GAPDH*: F:5'-ATGGGGAAGGTGAAGGTCG-3', R:5'-GGGGTCATTGATGGCAACAATA-3'; *CTGF*: F:5'-CCAATGACAACGCCTCTCG-3', R:5'-TGGTGCAGCCAGAAAGCTC-3'; *CYR61*: F:5'-AGCCTCGCATCTATAACAACC-3', R:5'-TTCTTTCACAAGCGGCACTC-3', *ANKRD1*: F:5'-CACTTCTAGCCACCCTGTGA-3', R:5'-CCACAGTTCGTAATGATT-3'.

### Colony formation

Two thousand mesothelioma cells were seeded into each well of 12-well plates. After a 2-week culture, cells were washed with PBS and fixed in 4% PFA for 15 min. The fixed cells were then washed and stained using 0.1% crystal violet (Servicebio, #G104) for 15 min. Pictures were taken using a light microscope and analyzed by ImageJ.

### CCK8 assay

Cells cultured in 96-well plates were subjected to CCK8 assay. At indicated time points, 10% CCK8 solution was added to each well of the plate and incubated in the dark at 37°C for 1 h. Then the absorbance of each well at 450 nm was measured using a microplate reader.

### Tumor xenograft model

To generate xenograft mouse tumors, mesothelioma cells were resuspended in PBS at a concentration of  $1 \times 10^7$  cells/ml, and 100  $\mu$ L of cell suspension was injected subcutaneously into the dorsal flank of nude mice. After implantation, tumor growth was monitored and measured every three days. The tumor volume was calculated using the modified ellipsoidal formula:  $V = 1/2(\text{Length} \times \text{Width}^2)$ . Mice were sacrificed when the average size of mesothelioma xenografts reached 1 cm<sup>3</sup>.

### AAV6 virus production and injection

AAV6 virus was produced by OBIO Technology. pcAAV-3xFlag-SuperHippo-P2A-NF2 was sequenced and packaged into AAV6. The viral titer of AAV6-SuperHippo-P2A-NF2 was  $1.50 \times 10^{13}$  v.g./mL, as determined by quantitative PCR. For intratumoral injections, about  $1 \times 10^{11}$  v.g. of the virus was injected slowly into the tumor with a 33-gauge needle. For intrathoracic injection, about  $2.5 \times 10^{11}$  v.g. of AAV6-SuperHippo-P2A-NF2 virus was injected into the pleural cavity of mice at a depth of 2–3 mm.

### Histology and IHC staining

Tissue or tumor samples were dissected carefully from mice and immediately fixed in 4% formalin, dehydrated through graded alcohols, and embedded in paraffin. Tissue or tumor sections about 5  $\mu$ m-thick were cut using a microtome (LEICA, RM2235). The sections were then deparaffinized, rehydrated, and stained with hematoxylin and eosin (H&E) according to standard protocols. For IHC staining, paraffin-embedded sections were baked at 65°C overnight, followed by deparaffinization and hydration. Then heat-induced antigen retrieval was performed using sodium citrate buffer (Beyotime, P0083) following the manufacturer's protocol. Endogenous peroxidase activities were inactivated by 3% H<sub>2</sub>O<sub>2</sub> for 30 min. After blocking with 3% BSA-PBST, sections were incubated overnight at 4°C with anti-Mesothelin (PA5-79698, Invitrogen), anti-WT1 (83535, Cell Signaling Technology) and anti-Ki67(ab15580, Abcam) primary antibodies and subsequently with Envision anti-Rabbit (DAKO, K4002) secondary antibody. Sections were counterstained with hematoxylin and mounted with PermOUNT Mounting Media. Images were taken using the Olympus VS200 Microscope.

### TEAD inhibitors for cell-based assays

Two TEAD inhibitors, VT103 and VT107, were used to treat mesothelioma cells in this study.<sup>51</sup> Briefly, VT103 and VT107 were dissolved in DMSO and added into the culture medium at indicated concentrations. For the colony formation assay, the culture medium containing VT103 and VT107 was refreshed every two days to maintain optimal conditions for the experiment.

#### QUANTIFICATION AND STATISTICAL ANALYSIS

All results were presented as mean  $\pm$  SEM. Statistical analysis was performed using GraphPad Prism 9 software (GraphPad Software, Inc, USA). Comparisons between the two groups were made using unpaired Student's *t*-tests. One-way ANOVA was used for multiple comparisons. Data marked with asterisks are significantly different from the control as follows: \**p* < 0.05, \*\**p* < 0.01, \*\*\**p* < 0.001, and n.s. indicates not significant.

Cell Reports Medicine, Volume 5

## Supplemental information

### Gene therapy for diffuse pleural mesotheliomas in preclinical models by concurrent expression of *NF2* and *SuperHippo*

Rui Zhu (朱锐), Xincheng Liu (柳鑫成), Xu Zhang (张栩), Zhenxing Zhong (钟振兴), Sixian Qi (祁思娴), Ruxin Jin (靳茹忻), Yuan Gu (顾远), Yu Wang (王瑜), Chen Ling (凌晨), Kang Chen (陈康), Dan Ye (叶丹), and Fa-Xing Yu (余发星)



**Figure S1. Deletion of *SAV1* or *WWC1-3* induces expression of YAP/TAZ target genes. Related to Figure 1.**

(A) Upregulated mRNA levels of YAP/TAZ target genes *ANKRD1*, *CTGF*, and *CYR61* in *SAV1* KO DPM cells.

(B) Upregulated mRNA levels of YAP/TAZ target genes in *WWC1-3* KO DPM cells.

Data are presented as mean  $\pm$  SEM from three independent experiments. Statistical significance: \*,  $p < 0.05$ , \*\*,  $p < 0.01$ , \*\*\*,  $p < 0.001$ . Student's *t*-test.



**Figure S2. Downregulation of *SAV1* or *WWC1-3* expression promotes the tumor-forming capacity of DPM cells. Related to Figure 2.**

(A and B) Crystal violet staining of colonies in *SAV1* or *WWC1-3* KO mesothelioma cell lines.

(C) VT103 and VT107 block colony formation of *WWC1-3* KO NCI-H2052 and NCI-H2373 cells.

(D) Gross tumor images of xenografts derived from *SAV1* KO NCI-H2052 cells implanted in nude mice. Scale bar, 1 cm.

(E and F) Growth curve and tumor weight analysis of control and *SAVI* KO NCI-H2052 tumor xenografts. Five mice and 10 tumors for each group were analyzed.

(G) Gross tumor images of xenografts derived from *WWC1-3* KO NCI-H2052 cells implanted in nude mice. Scale bar, 1 cm.

(H and I) Growth curve and tumor weight analysis of control and *WWC1-3* KO NCI-H2052 tumor xenografts. Five mice and 9 tumors for each group were analyzed.

(J and K) Histological assessment of *SAVI* KO NCI-H2052 tumor xenografts. H&E and IHC (Ki67 and YAP) staining and quantifications. Scale bar, 100  $\mu$ m.

(L and M) Histological assessment of control and *WWC1-3* KO NCI-H2052 tumor xenografts. H&E and IHC (Ki67 and YAP) staining and quantifications. Scale bar, 100  $\mu$ m.

Data are presented as mean  $\pm$  SEM. Statistical significance: \*,  $p < 0.05$ , \*\*,  $p < 0.01$ , \*\*\*,  $p < 0.001$ . The Two-way ANOVA test was used for tumor growth curves (D, I), and the Student's *t*-test was used for other data.



**Figure S3. Accelerated mesothelioma development upon *Sav1* or *Wwc1/2* deletion in the mesothelium of pleural cavities. Related to Figure 3.**

(A) Schematic diagram indicating experimental procedure. Mice (n = 3-5 per group) at 4-week-old were injected with Adeno-Cre to delete corresponding genes, lungs and hearts were collected after 45 weeks for histological analysis.

(B) H&E staining of lungs and hearts from mice with different genotypes. Scale bar, 50  $\mu$ m.

(C) Schematic diagram indicating experimental procedure. Mice (n = 5 per group) at 4-week-old were injected with Adeno-Cre to delete corresponding genes, lungs and hearts were collected after 8 weeks for histological analysis.

(D) H&E and IHC staining of lungs and hearts from mice with different genotypes. The expression of WT1, Mesothelin, and Ki67 were determined by IHC. Scale bars, 5 mm for gross organ images, and 50  $\mu$ m for H&E or IHC images.

(E and F) Quantification of the average thickness of lung and heart mesothelium in mice with different genotypes. Mesothelium thickness is primarily defined by Mesothelin staining signals.

(G) H&E of diaphragms from mice with different genotypes. Tissues were collected 8 weeks after Cre induction. Scale bar, 100  $\mu$ m.

Data are presented as mean  $\pm$  SEM. Statistical significance: \*,  $p < 0.05$ , \*\*,  $p < 0.01$ , \*\*\*,  $p < 0.001$ . The Student's *t*-test was used for statistical analysis.



**Figure S4. Activation of Hippo signaling pathway by SuperHippo expression in an NF2-independent manner. Related to Figure 4.**

(A) Expression of SuperHippo effectively activated the Hippo signaling pathway in WT HEK293A cells.

(B) Expression of SuperHippo induced phosphorylation of LATS1/2 and YAP and decreased CYR61 expression in WT or *NF2* KO HEK293A cells.

(C) The Annexin V-FITC/PI staining assay was performed to detect apoptosis induced by SuperHippo expression in mesothelioma cell lines. Representative flow cytometry plots were shown.

(D) Quantification of apoptotic cell percentages in mesothelioma cell lines between control and SuperHippo groups.

Data are presented as mean  $\pm$  SEM from three or six independent experiments. Statistical significance: \*,  $p < 0.05$ , \*\*,  $p < 0.01$ , \*\*\*,  $p < 0.001$ . Student's *t*-test was used.



**Figure S5. Expression of SuperHippo in mouse mesothelium has no evident phenotype. Related to Figure 5.**

(A) Immunoblotting of SuperHippo expression (Flag tag) in lung and heart of *Nf2<sup>fl/fl</sup>; Trp53<sup>fl/fl</sup>* and *Nf2<sup>fl/fl</sup>; Trp53<sup>fl/fl</sup>; Superhippo<sup>fl/+</sup>* mice.

(B) Schematic diagram indicating experimental procedure. Mice ( $n = 3$  per group) at 4-week-old were injected with Adeno-Cre to induce SuperHippo expression in the pleural mesothelium. After 4 weeks, lungs and hearts were collected for histological analysis.

(C) Gross image and histological analysis of lungs and hearts. H&E and IHC staining for WT1 and Mesothelin was performed. Scale bar, 5 mm for gross images, and 50  $\mu$ m for H&E or IHC images.

(D and E) Quantification of the average thickness of lung and heart mesothelium. Mesothelium thickness is primarily defined by Mesothelin staining signals.

(F) Immunoblotting of SuperHippo expression in lung and heart of mice.



**Figure S6. AAV6-mediated expression of *SuperHippo-P2A-NF2* in DPM tumors. Related to Figure 6.**

(A) Assessment of transduction efficacy of various AAV serotypes in NCI-H2052 cells. GFP signal indicates viral transduction and ectopic protein expression. DIC images indicate cell density.

(B) H&E and Ki67 immunostaining of xenograft tumors treated with AAV6-control or AAV6-*SuperHippo-P2A-NF2*. Scale bars, 50  $\mu$ m.

(C) Expression and cleavage of *SuperHippo-P2A-NF2* in *WWC tKO* NCI-H2052 mesothelioma cells treated with AAV6-*SuperHippo-P2A-NF2*.



**Figure S7. The efficacy of *NF2*, *SuperHippo*, or *SuperHippo-P2A-NF2* in mouse DPM model. Related to Figure 7.**

(A) Schematic diagram illustrating the experimental procedure. Adeno-Cre was injected intrathoracically into 4-week-old *Nf2<sup>fl/fl</sup>; Trp53<sup>fl/fl</sup>* mice to initiate DPM. One week later, AAV6-control, AAV6-*NF2*, AAV6-*SuperHippo*, and AAV6-*SuperHippo-P2A-NF2* were injected intrathoracically into the mice, respectively. Lungs and hearts were collected for histological analysis after an additional 4 weeks.  $n = 3-4$  for each group.

(B) H&E and IHC staining of lung and heart tissue sections from control and treated mice. IHC for WT1 and Mesothelin was shown. Scale bar, 5 mm for gross lung and heart images, and 50  $\mu\text{m}$  for H&E or IHC images.

(C and D) Measurement of the average thickness of lung and heart mesothelium in mice from control and treated groups. Mesothelium thickness is primarily defined by Mesothelin staining signals.

(E) Immunoblotting analysis of *NF2*, *SuperHippo*, and *SuperHippo-P2A-NF2* expression and cleavage in lungs and hearts from mice treated with AAV6-*NF2*, AAV6-*SuperHippo*, and AAV6-*SuperHippo-P2A-NF2*. The expression of CYR61 was also reduced in treated samples.

Data are presented as mean  $\pm$  SEM. Statistical significance: \*,  $p < 0.05$ , \*\*,  $p < 0.01$ , \*\*\*,  $p < 0.001$ . The Student's *t*-test was used.
